# Supplementary material for: Low valent lead and tin hydrides in reactions with heteroallenes
Source: Royal Society of Chemistry journal article supplement (doi:10.1039/d1dt00542a), 2021-01-01
Supplement: d1dt00542a1.pdf [file d1dt00542a1.pdf]

## Supporting Information

### Low valent lead and tin hydrides in reaction with heteroallenes

Sebastian Weiß, Max Widemann, Klaus Eichele, Hartmut Schubert and Lars Wesemann\*<sup>a</sup>

#### Content

|                                     |    |
|-------------------------------------|----|
| Data of crystallography .....       | 2  |
| NMR spectroscopy .....              | 5  |
| NMR Data of compound <b>1</b> ..... | 5  |
| NMR Data of compound <b>2</b> ..... | 8  |
| NMR Data of compound <b>3</b> ..... | 11 |
| NMR Data of compound <b>5</b> ..... | 17 |
| NMR Data of compound <b>6</b> ..... | 23 |
| NMR Data of compound <b>7</b> ..... | 27 |
| Quantum chemical calculations ..... | 30 |
| References.....                     | 30 |

## Data of crystallography

Table S1. Data of crystal structure determination.

|                                                               | 1                                                                 | 2                                                                 | 3                                                                 | 4                                                                 | 5                                                                 | 6                                                                 |
|---------------------------------------------------------------|-------------------------------------------------------------------|-------------------------------------------------------------------|-------------------------------------------------------------------|-------------------------------------------------------------------|-------------------------------------------------------------------|-------------------------------------------------------------------|
| Emp. formula                                                  | C <sub>49</sub> H <sub>72</sub> N <sub>2</sub> Sn                 | C <sub>43</sub> H <sub>62</sub> N <sub>2</sub> Pb                 | C <sub>47</sub> H <sub>65</sub> NOSn                              | C <sub>47</sub> H <sub>65</sub> NOPb                              | C <sub>79</sub> H <sub>114</sub> O <sub>2</sub> Sn <sub>2</sub>   | C <sub>73</sub> H <sub>100</sub> S <sub>2</sub> Sn <sub>2</sub>   |
| <i>M</i> [g/mol]                                              | 807.77                                                            | 816.16                                                            | 778.69                                                            | 867.19                                                            | 1333.08                                                           | 1279.08                                                           |
| $\lambda$ [Å]                                                 | 0.71073                                                           | 0.71073                                                           | 0.71073                                                           | 0.71073                                                           | 0.71073                                                           | 0.71073                                                           |
| <i>T</i> [K]                                                  | 100(2)                                                            | 100(2)                                                            | 100(2)                                                            | 100(2)                                                            | 100(2)                                                            | 100(2)                                                            |
| crystal system                                                | monoclinic                                                        | triclinic                                                         | monoclinic                                                        | monoclinic                                                        | monoclinic                                                        | monoclinic                                                        |
| space group                                                   | <i>P</i> 2 <sub>1</sub> / <i>c</i>                                | <i>P</i> -1                                                       | <i>P</i> 2 <sub>1</sub> / <i>c</i>                                | <i>P</i> 2 <sub>1</sub> / <i>c</i>                                | <i>C</i> 2/ <i>c</i>                                              | <i>P</i> 2 <sub>1</sub>                                           |
| <i>Z</i>                                                      | 4                                                                 | 2                                                                 | 4                                                                 | 4                                                                 | 4                                                                 | 4                                                                 |
| <i>a</i> [Å]                                                  | 13.0631(8)                                                        | 10.6529(3)                                                        | 19.0046(14)                                                       | 19.0155(7)                                                        | 22.3552(4)                                                        | 15.3777(3)                                                        |
| <i>b</i> [Å]                                                  | 20.0701(12)                                                       | 14.1442(4)                                                        | 18.4257(12)                                                       | 18.4067(7)                                                        | 16.2894(3)                                                        | 24.2581(4)                                                        |
| <i>c</i> [Å]                                                  | 17.0055(11)                                                       | 15.6309(4)                                                        | 12.0392(8)                                                        | 12.1142(4)                                                        | 19.6949(4)                                                        | 18.4918(3)                                                        |
| $\alpha$ [°]                                                  | 90                                                                | 108.6230(10)                                                      | 90                                                                | 90                                                                | 90                                                                | 90                                                                |
| $\beta$ [°]                                                   | 97.061(3)                                                         | 94.426(2)                                                         | 99.420(5)                                                         | 99.691(2)                                                         | 96.3620(10)                                                       | 91.9830(10)                                                       |
| $\gamma$ [°]                                                  | 90                                                                | 112.0080(10)                                                      | 90                                                                | 90                                                                | 90                                                                | 90                                                                |
| <i>V</i> [Å <sup>3</sup> ]                                    | 4424.6(5)                                                         | 2016.66(10)                                                       | 4159.0(5)                                                         | 4179.6(3)                                                         | 7127.8(2)                                                         | 6893.9(2)                                                         |
| <i>D<sub>c</sub></i> [g/cm <sup>3</sup> ]                     | 1.213                                                             | 1.344                                                             | 1.244                                                             | 1.378                                                             | 1.242                                                             | 1.232                                                             |
| $\mu$ [mm <sup>-1</sup> ]                                     | 0.611                                                             | 4.212                                                             | 0.649                                                             | 4.071                                                             | 0.744                                                             | 0.823                                                             |
| F(000)                                                        | 1720                                                              | 836                                                               | 1648                                                              | 1776                                                              | 2816                                                              | 2680                                                              |
| crystal size [mm]                                             | 0.22x0.20x0.18                                                    | 0.17x0.15x0.14                                                    | 0.17x0.15x0.13                                                    | 0.19x0.14x0.12                                                    | 0.18x0.16x0.14                                                    | 0.16x0.14x0.11                                                    |
| $\theta$ range [°]                                            | 1.571 – 27.866                                                    | 3.027 – 30.229                                                    | 2.040 – 27.547                                                    | 2.465 – 28.336                                                    | 1.809 – 28.050                                                    | 1.385 – 29.193                                                    |
| limiting indices                                              | -17 ≤ <i>h</i> ≤ 17<br>-25 ≤ <i>k</i> ≤ 26<br>-22 ≤ <i>l</i> ≤ 22 | -14 ≤ <i>h</i> ≤ 15<br>-19 ≤ <i>k</i> ≤ 20<br>-22 ≤ <i>l</i> ≤ 21 | -24 ≤ <i>h</i> ≤ 24<br>-23 ≤ <i>k</i> ≤ 23<br>-15 ≤ <i>l</i> ≤ 15 | -23 ≤ <i>h</i> ≤ 25<br>-24 ≤ <i>k</i> ≤ 24<br>-16 ≤ <i>l</i> ≤ 16 | -29 ≤ <i>h</i> ≤ 29<br>-21 ≤ <i>k</i> ≤ 21<br>-26 ≤ <i>l</i> ≤ 26 | -21 ≤ <i>h</i> ≤ 20<br>-32 ≤ <i>k</i> ≤ 33<br>-25 ≤ <i>l</i> ≤ 25 |
| refl. coll.                                                   | 153507                                                            | 49601                                                             | 36732                                                             | 52598                                                             | 58989                                                             | 74582                                                             |
| ind. refl.                                                    | 10496                                                             | 11602                                                             | 9533                                                              | 10393                                                             | 8614                                                              | 33865                                                             |
| <i>R<sub>int</sub></i>                                        | 0.0323                                                            | 0.0255                                                            | 0.0827                                                            | 0.0582                                                            | 0.0602                                                            | 0.0479                                                            |
| completeness                                                  | 99.5                                                              | 99.6                                                              | 99.3                                                              | 99.8                                                              | 99.6                                                              | 99.4                                                              |
| abs. correction                                               | multi-scan                                                        | numerical                                                         | multi-scan                                                        | multi-scan                                                        | multi-scan                                                        | multi-scan                                                        |
| max., min. trans.                                             | 0.75, 0.65                                                        | 0.75, 0.67                                                        | 0.75, 0.61                                                        | 0.75, 0.58                                                        | 0.75, 0.69                                                        | 0.6974, 0.7458                                                    |
| Para./restr.                                                  | 481 / 0                                                           | 450/2                                                             | 497/18                                                            | 500/1                                                             | 401 / 1                                                           | 1514 / 18                                                         |
| <i>R</i> 1, <i>wR</i> 2 [ <i>I</i> > 2 $\sigma$ ( <i>I</i> )] | 0.0239, 0.0585                                                    | 0.0291, 0.0644                                                    | 0.0669, 0.1145                                                    | 0.0693, 0.1587                                                    | 0.0546, 0.1334                                                    | 0.0373, 0.0718                                                    |
| <i>R</i> 1, <i>wR</i> 2 (all data)                            | 0.0278, 0.0608                                                    | 0.0390, 0.0673                                                    | 0.1157, 0.1287                                                    | 0.0829, 0.1628                                                    | 0.0795, 0.1436                                                    | 0.0518, 0.0759                                                    |
| Goof on <i>F</i> <sup>2</sup>                                 | 1.019                                                             | 1.087                                                             | 1.258                                                             | 1.295                                                             | 1.029                                                             | 0.979                                                             |
| peak / hole [ <i>e</i> · Å <sup>-3</sup> ]                    | 1.199, -0.538                                                     | 2.065, -3.753                                                     | 1.121, -1.042                                                     | 1.804, -3.410                                                     | 1.920, -0.696                                                     | 0.813, -0.479                                                     |
| CCDC                                                          | 2063449                                                           | 2063447                                                           | 2063446                                                           | 2063451                                                           | 2063448                                                           | 2063450                                                           |

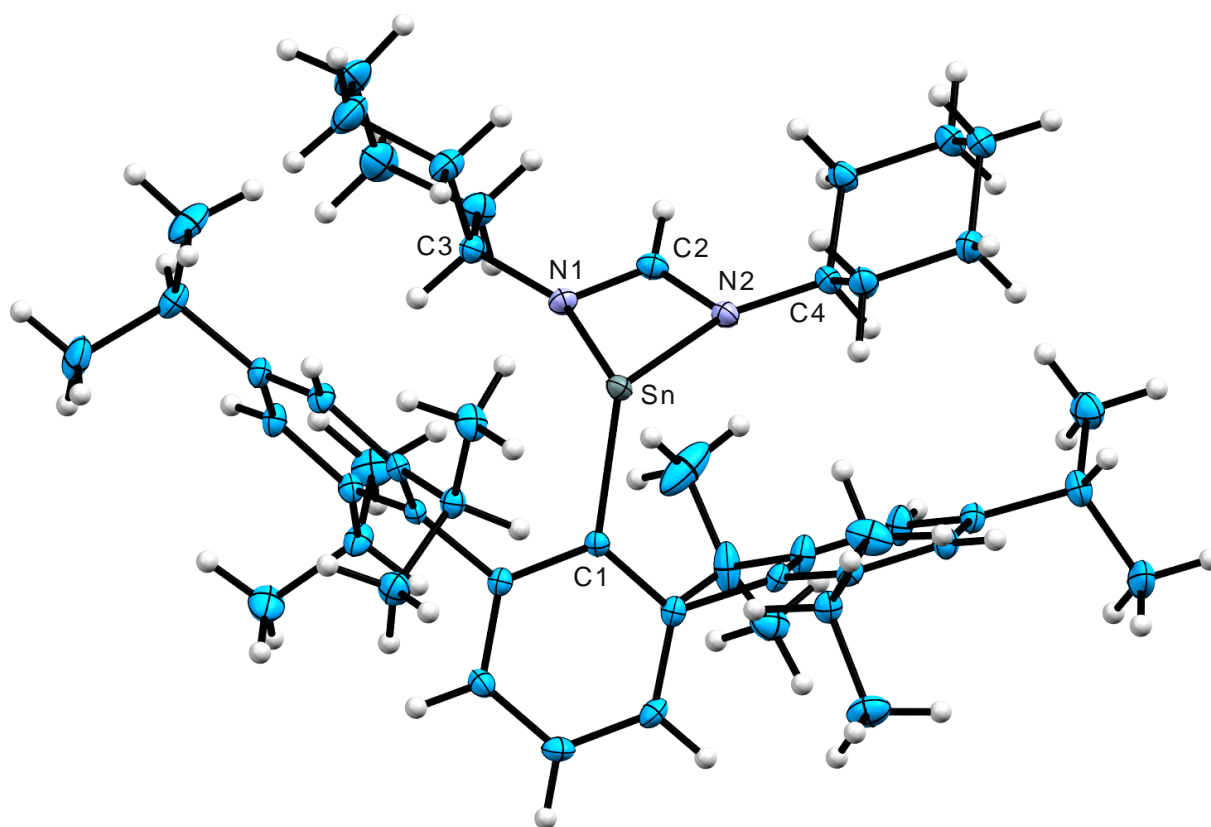

Figure S1. ORTEP (50% thermal ellipsoids) with selected atom labeling of **1**. Selected bond distances [ $\text{\AA}$ ] and angles [deg] for **1**: Sn–N1 2.2193(12), Sn–N2 2.2333(12), Sn–C1 2.2332(14), N1–C2 1.3214(19), N2–C2 1.3154(19), N1–Sn–N2 59.77(4), N2–C2–N1 114.58(13), C2–N1–Sn 91.66(9), C2–N2–Sn 91.21(9), N1–Sn–C1 101.84(5), C1–Sn–N2 107.87(5).

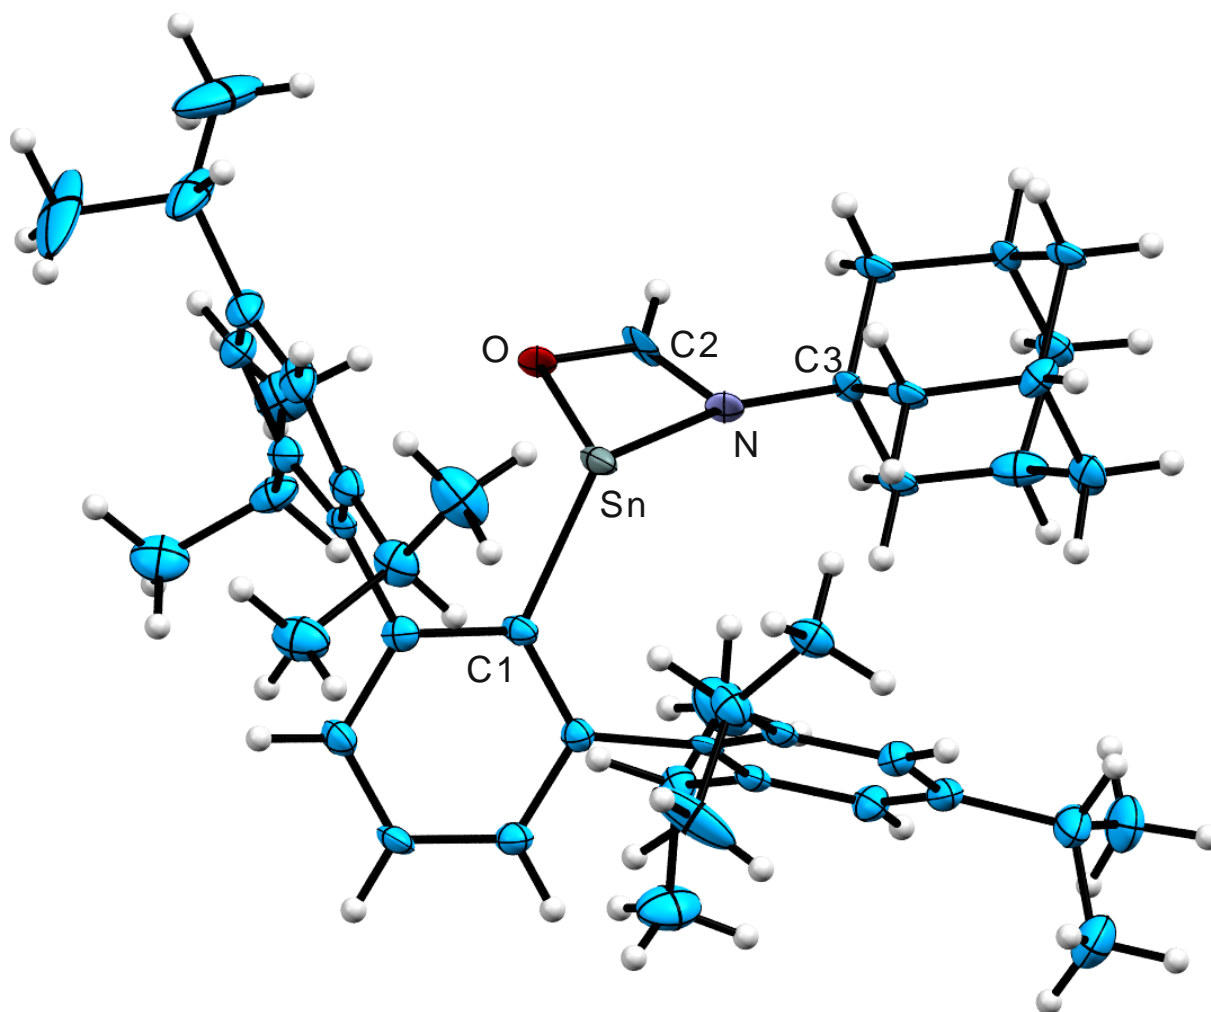

Figure S2. ORTEP (50% thermal ellipsoids) with selected atom labeling of **3**. Selected bond distances [ $\text{\AA}$ ] and angles [deg] for **3**: Sn–O 2.211(4), Sn–N 2.294(5), Sn–C1 2.258(3), O–C2 1.295(7), N–C2 1.296(8), O–Sn–C1 95.18(15), O–Sn–N 59.11(17), C1–Sn–N 106.28(16), O–C2–N 118.2(5), C2–N–Sn 88.7(4), C2–O–Sn 92.4(4).

## NMR spectroscopy

NMR Data of compound **1**<sup>1</sup>H-NMR of Ar\*SnN(Cy)C(H)N(Cy) in C<sub>6</sub>D<sub>6</sub> at RT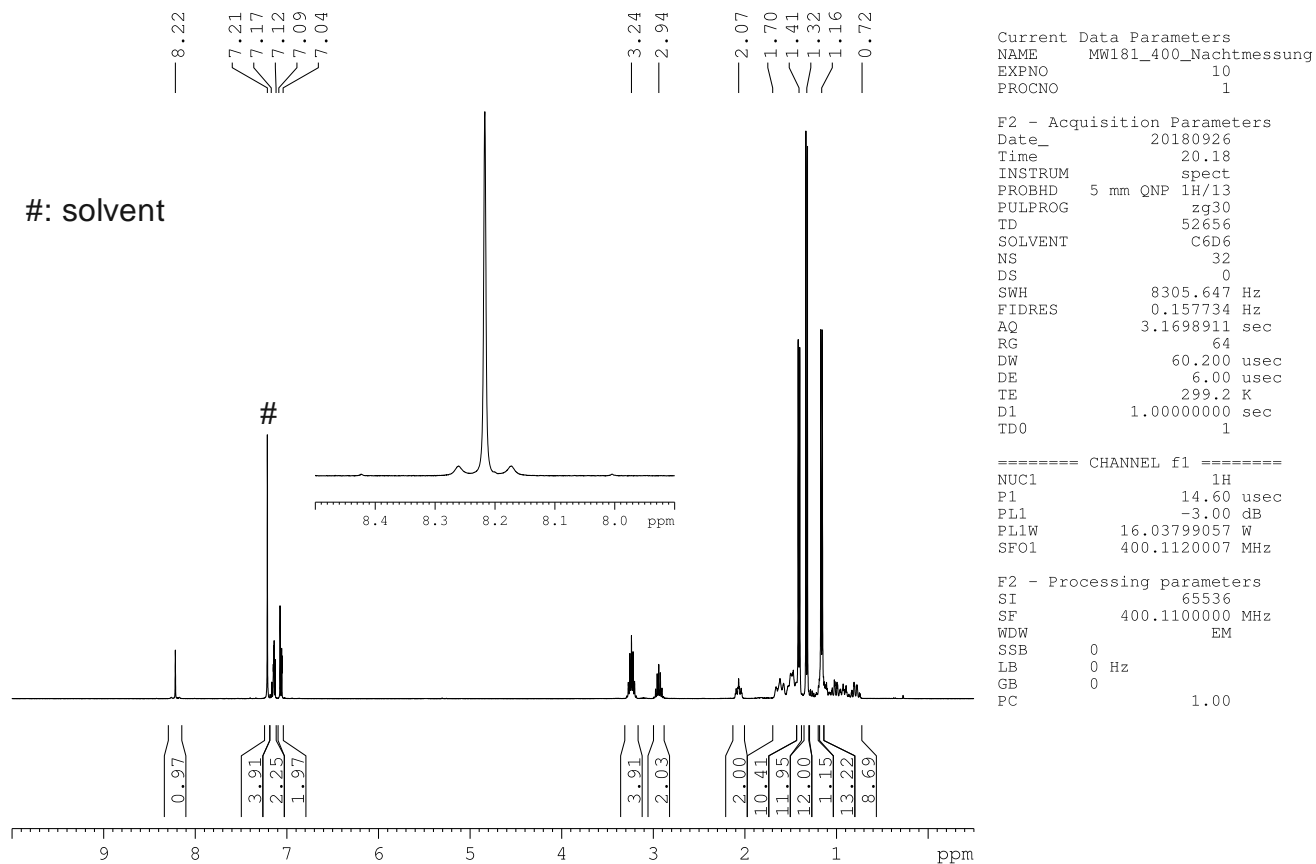Figure S3. <sup>1</sup>H NMR spectrum of **1**

$^{13}\text{C}\{^1\text{H}\}$ -NMR of Ar\*SnN(Cy)C(H)N(Cy) in  $\text{C}_6\text{D}_6$  at RT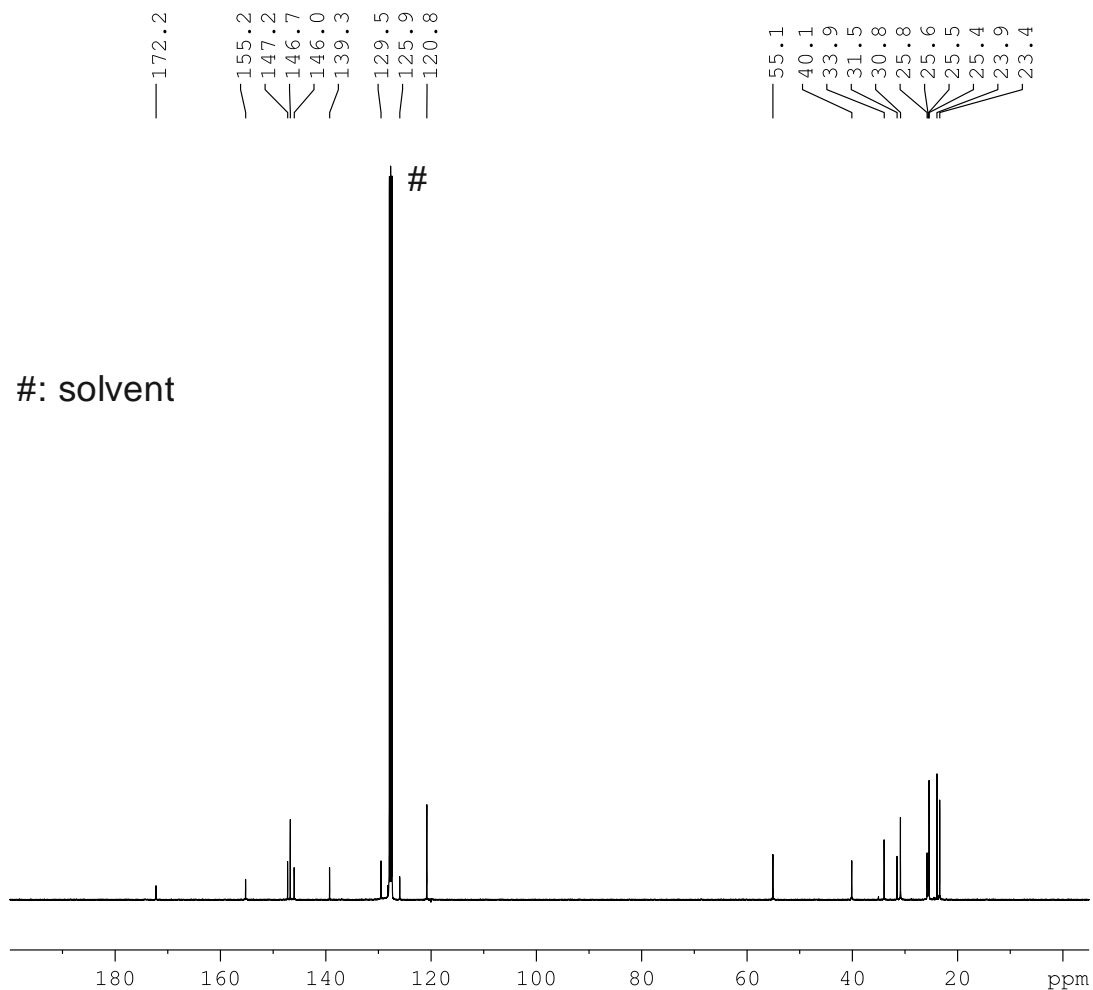

Current Data Parameters  
 NAME MW181\_400\_Nachtmessung  
 EXPNO 11  
 PROCNO 1

F2 - Acquisition Parameters  
 Date\_ 20180927  
 Time 1.41  
 INSTRUM spect  
 PROBHD 5 mm QNP 1H/13  
 PULPROG zgpg30  
 TD 53700  
 SOLVENT C6D6  
 NS 10000  
 DS 0  
 SWH 30864.197 Hz  
 FIDRES 0.574752 Hz  
 AQ 0.8699400 sec  
 RG 32800  
 DW 16.200 usec  
 DE 6.00 usec  
 TE 299.2 K  
 D1 1.00000000 sec  
 D11 0.03000000 sec  
 TD0 1

==== CHANNEL f1 =====  
 NUC1 13C  
 P1 13.50 usec  
 PL1 -4.16 dB  
 PL1W 78.55633545 W  
 SFO1 100.6198135 MHz

==== CHANNEL f2 =====  
 CPDPRG[2] waltz16  
 NUC2 1H  
 PCPD2 80.00 usec  
 PL2 -3.00 dB  
 PL12 11.77 dB  
 PL13 13.14 dB  
 PL2W 16.03799057 W  
 PL12W 0.53474891 W  
 PL13W 0.39007664 W  
 SFO2 400.1120007 MHz

F2 - Processing parameters  
 SI 65536  
 SF 100.6077400 MHz  
 WDW EM  
 SSB 0  
 LB 1.00 Hz  
 GB 0  
 PC 1.40

Figure S4.  $^{13}\text{C}\{^1\text{H}\}$  NMR spectrum of **1**

$^{119}\text{Sn}$ -NMR of  $\text{Ar}^*\text{SnN}(\text{Cy})\text{C}(\text{H})\text{N}(\text{Cy})$  in  $\text{C}_6\text{D}_6$  at RT

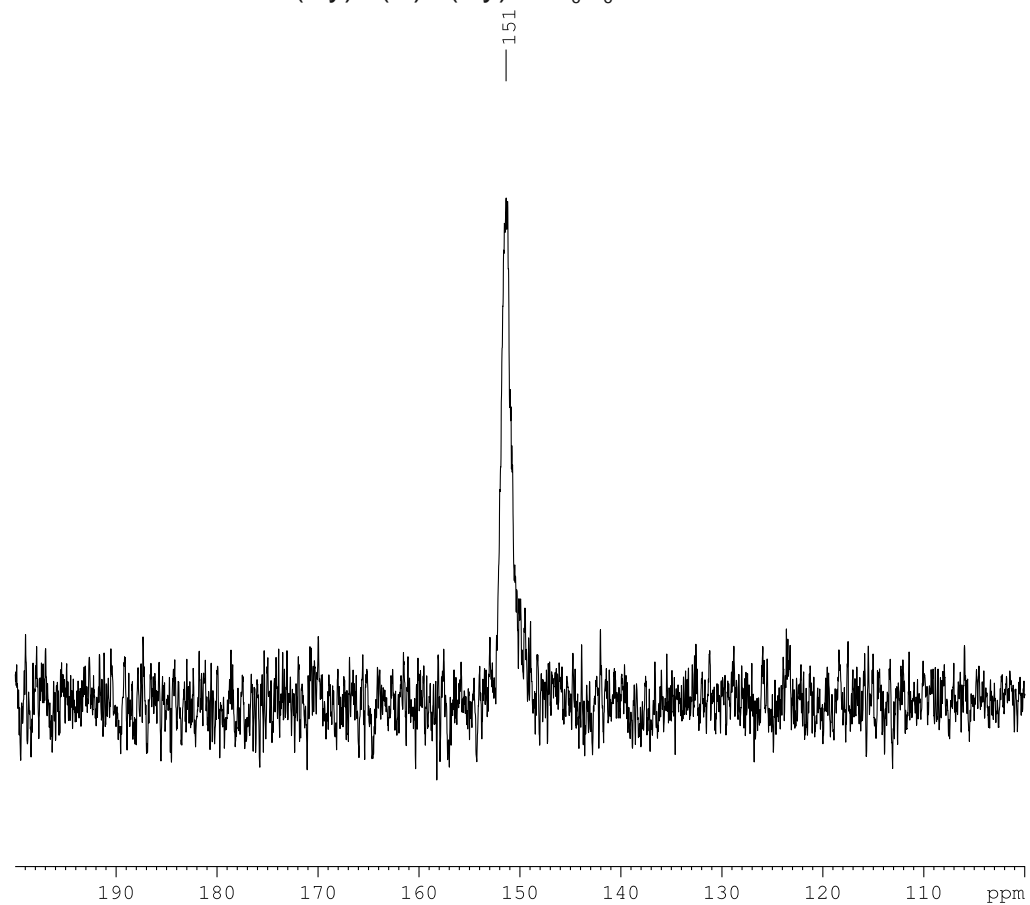

```
Current Data Parameters
NAME      MW177_250
EXPNO     11
PROCNO    1

F2 - Acquisition Parameters
Date_     20180914
Time      15.24
INSTRUM   spect
PROBHD    5 mm PABBO BB-
PULPROG   zg30
TD         32768
SOLVENT   C6D6
NS         4800
DS         0
SWH        74626.867 Hz
FIDRES     2.277431 Hz
AQ         0.2195456 sec
RG         14596.5
DW         6.700 usec
DE         5.50 usec
TE         299.2 K
D1         0.10000000 sec
TD0        1

===== CHANNEL f1 =====
NUC1      119Sn
P1        7.35 usec
PL1       0 dB
SFO1      93.3216955 MHz

F2 - Processing parameters
SI        65536
SF        93.2750580 MHz
WDW       EM
SSB       0
LB        5.00 Hz
GB        0
PC        3.00
```

Figure S5.  $^{119}\text{Sn}\{^1\text{H}\}$  NMR spectrum of **1**

NMR Data of compound **2** $^1\text{H}$ -NMR of Ar\*PbN(Dip)C(H)N(Dip) in  $\text{C}_6\text{D}_6$  at RT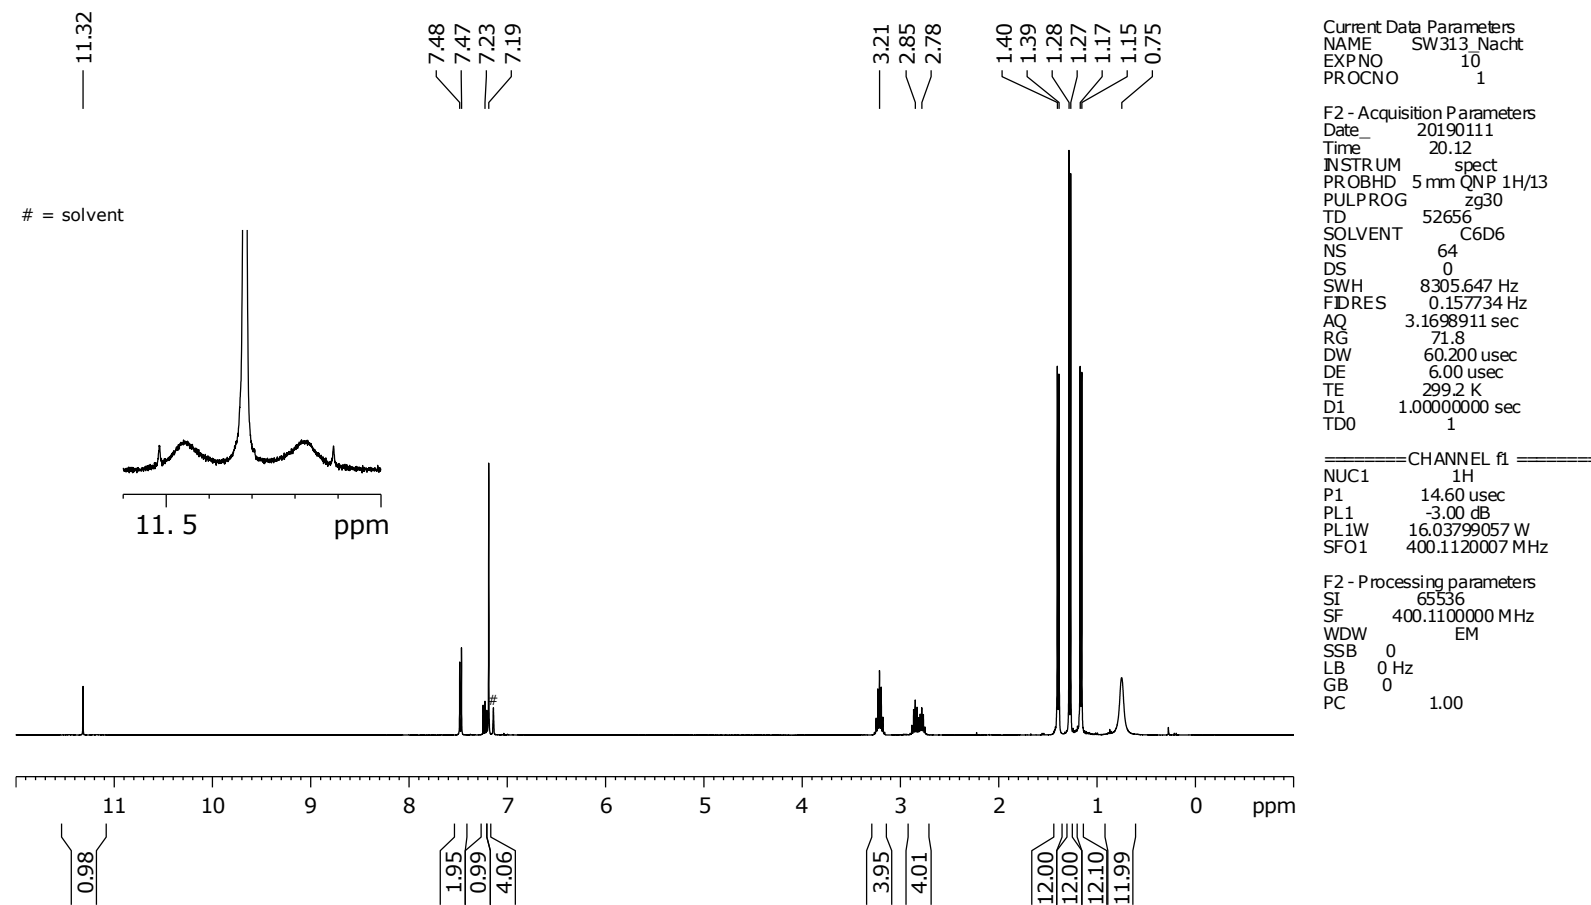Figure S6.  $^1\text{H}$  NMR spectrum of **2**



$^{13}\text{C}$ -NMR of  $\text{Ar}^*\text{PbN}(\text{Dip})\text{C}(\text{H})\text{N}(\text{Dip})$  in  $\text{C}_6\text{D}_6$  at RT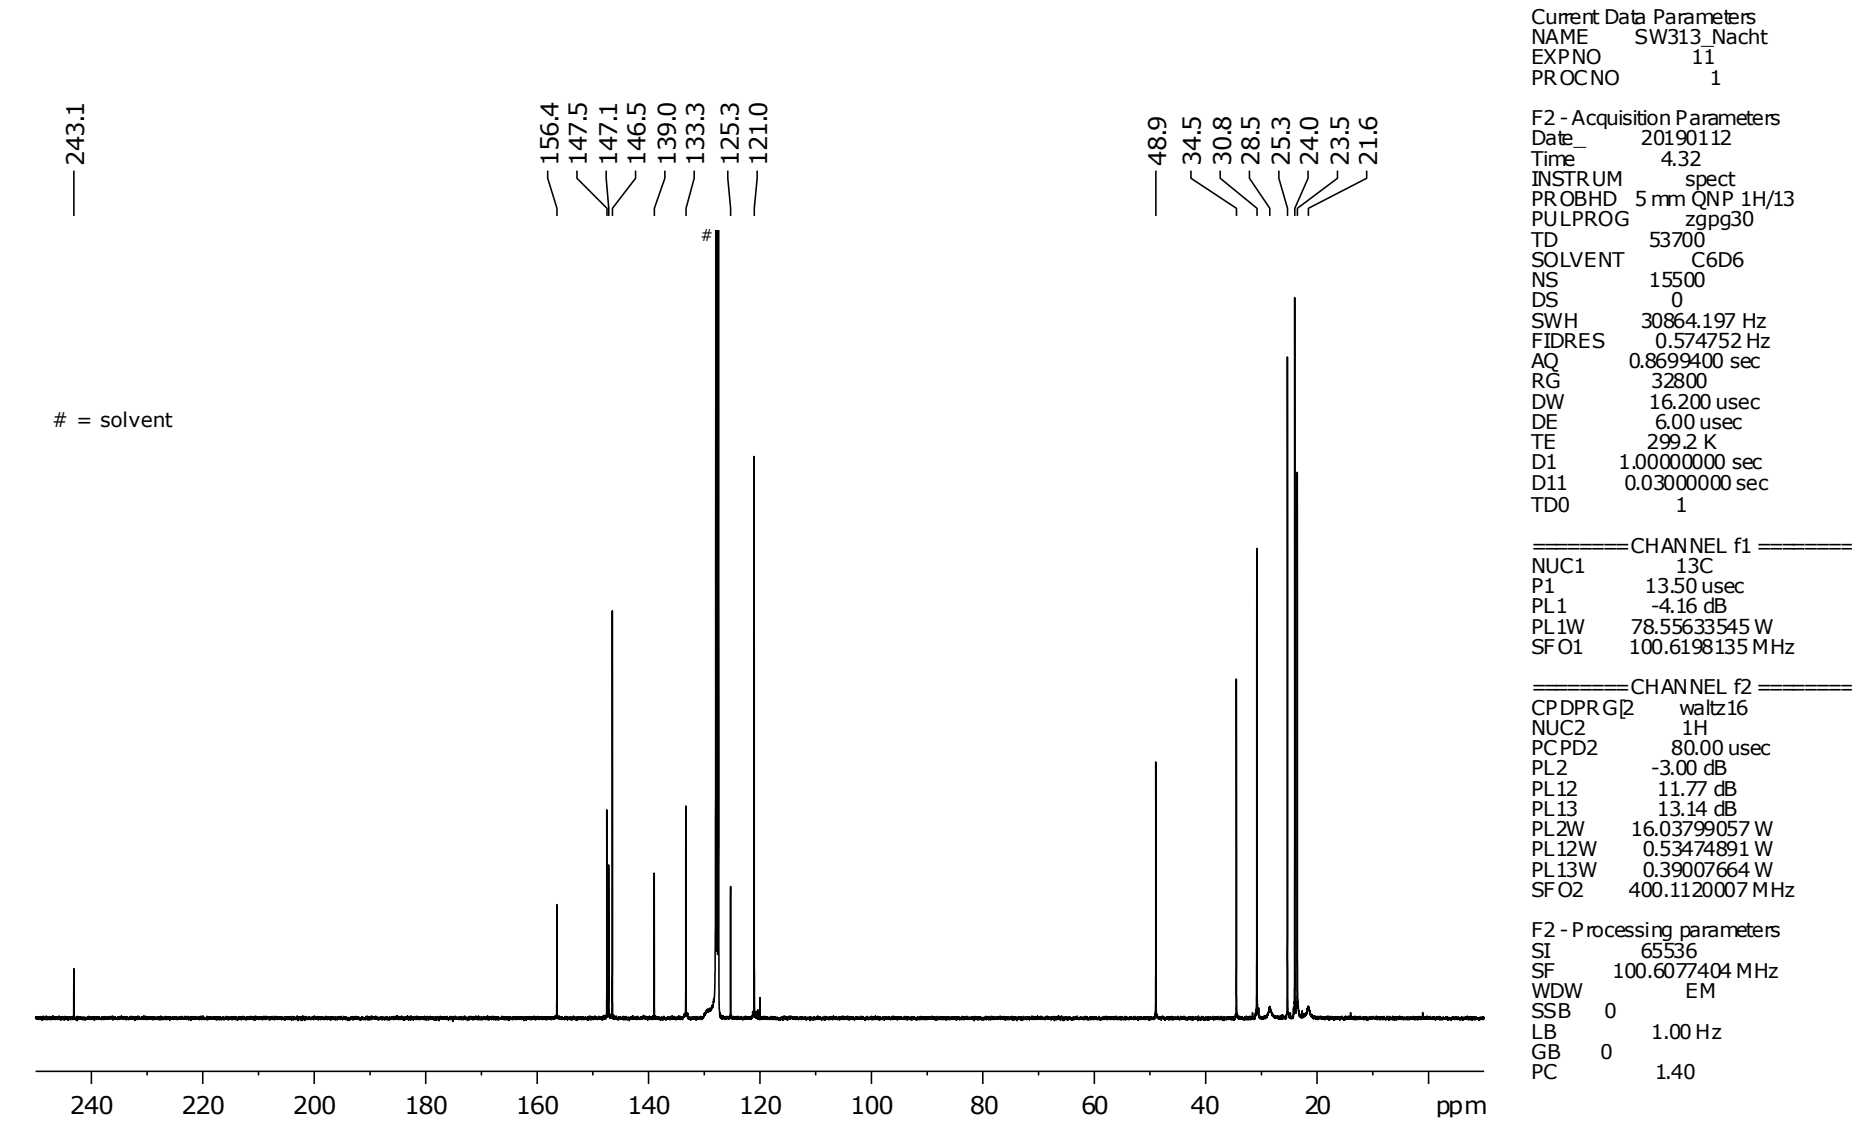Figure S7.  $^{13}\text{C}\{^1\text{H}\}$  NMR spectrum of **2**

$^{207}\text{Pb}$ -NMR of  $\text{Ar}^*\text{PbN}(\text{Dip})\text{C}(\text{H})\text{N}(\text{Dip})$  in  $\text{C}_6\text{D}_6$  at RT

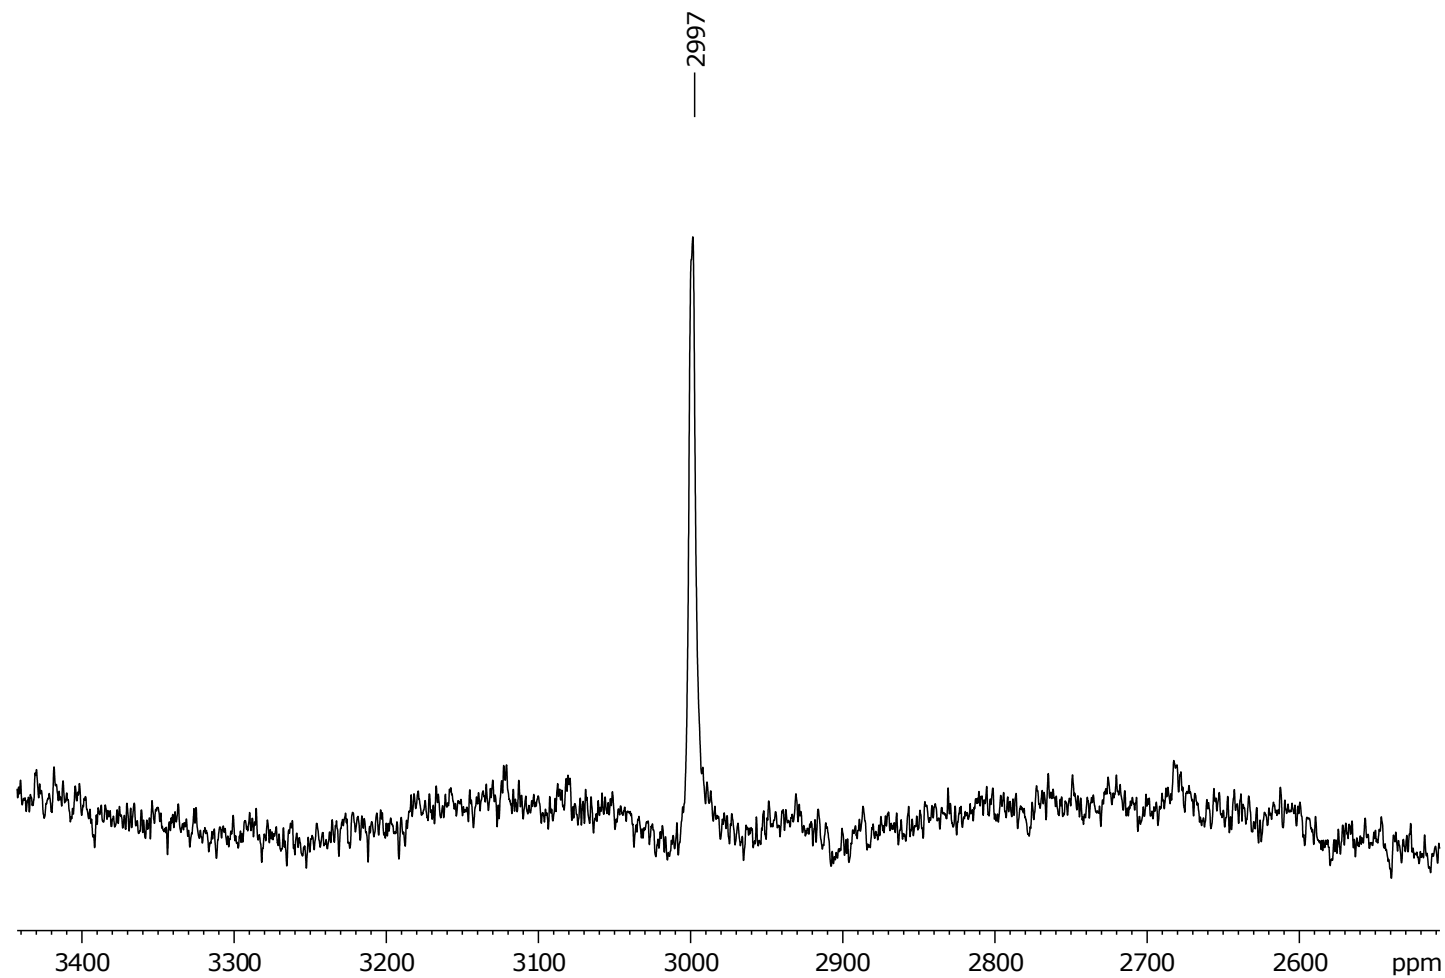

Figure S8.  $^{207}\text{Pb}\{^1\text{H}\}$  NMR spectrum of **2**

Current Data Parameters

NAME SW313\_Pb  
EXPNO 11  
PROCNO 1

F2 - Acquisition Parameters

Date\_ 20190114  
Time 20.06 h  
INSTRUM spect  
PROBHD Z104275\_0338 (  
PULPROG zg30  
TD 14998  
SOLVENT C6D6  
NS 24450  
DS 0  
SWH 125000.000 Hz  
FIDRES 8.334445 Hz  
AQ 0.0599920 sec  
RG 8.91  
DW 4.000 usec  
DE 6.50 usec  
TE 298.0 K  
D1 0.20000000 sec  
TD0 1  
SFO1 63.0087553 MHz  
NUC1  $^{207}\text{Pb}$   
P1 12.50 usec  
PLW1 40.00000000 W

F2 - Processing parameters

SI 65536  
SF 62.7889938 MHz  
WDW EM  
SSB 0  
LB 50.00 Hz  
GB 0  
PC 3.00

NMR Data of compound **3**<sup>1</sup>H-NMR of Ar\*SnN(Ad)C(H)O in C<sub>6</sub>D<sub>6</sub> at RT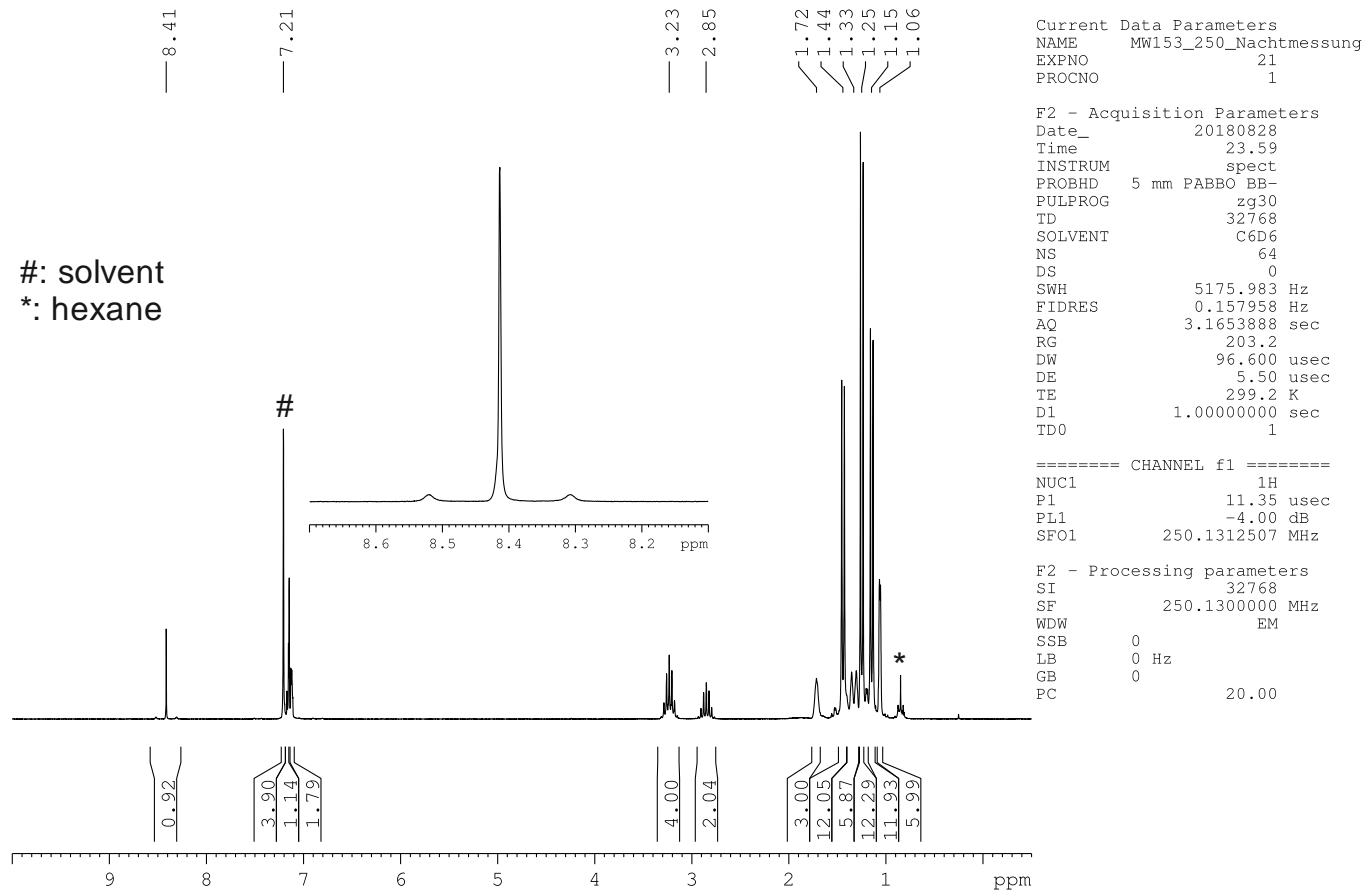Figure S9. <sup>1</sup>H NMR spectrum of **3**

$^{13}\text{C}\{^1\text{H}\}$ -NMR of Ar\*SnN(Ad)C(H)O in  $\text{C}_6\text{D}_6$  at RT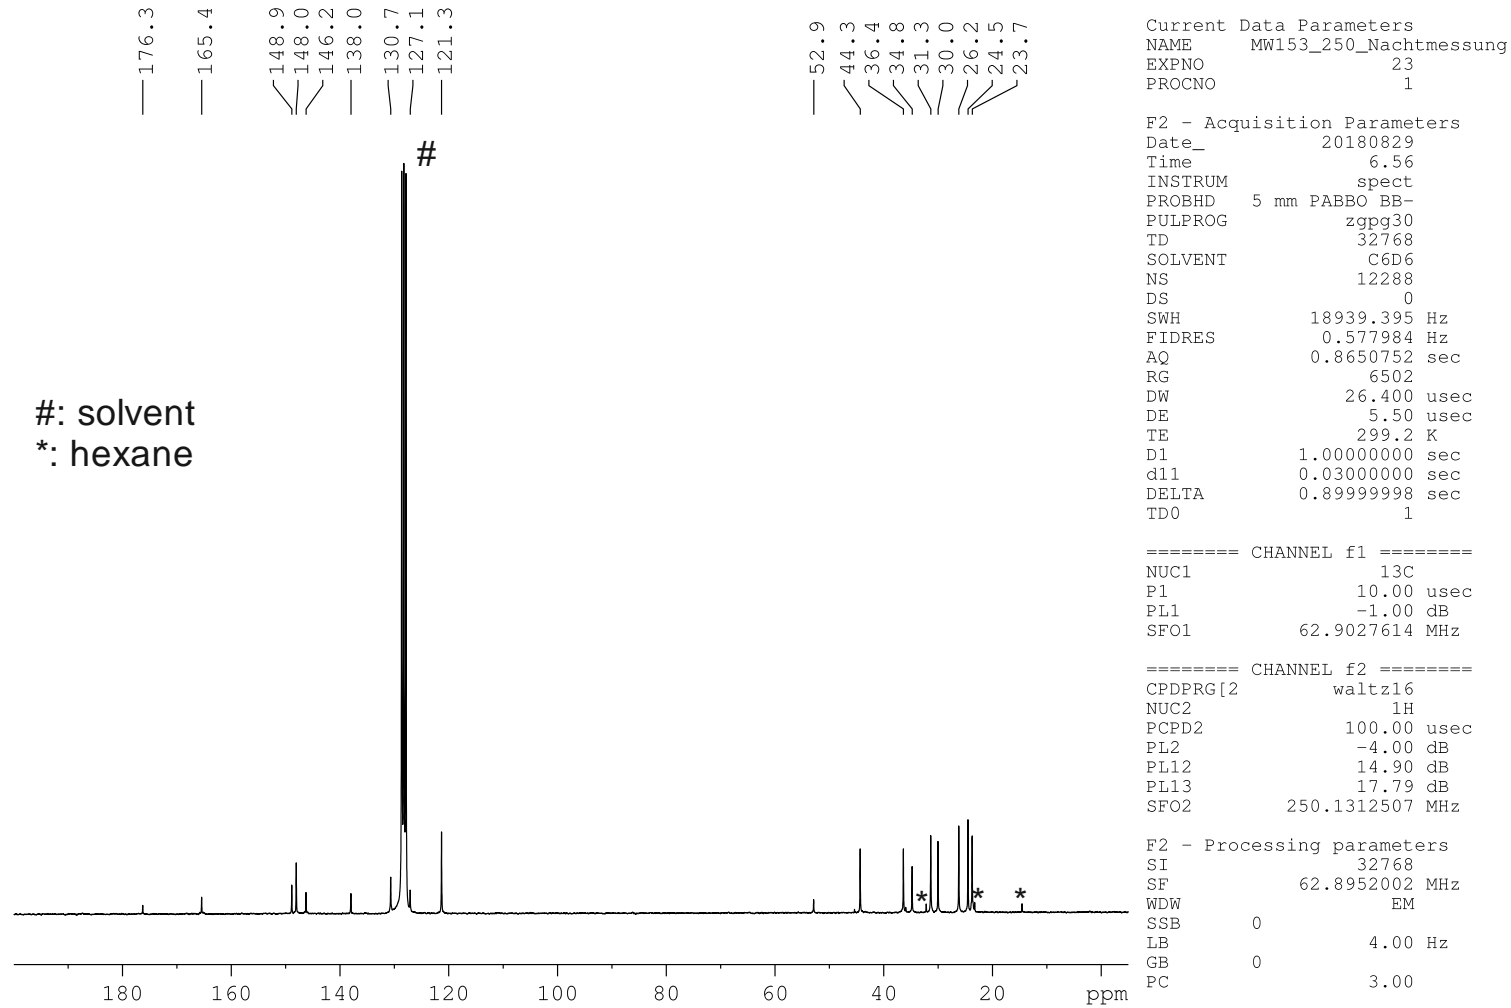Figure S10.  $^{13}\text{C}\{^1\text{H}\}$  NMR spectrum of **3**

$^{119}\text{Sn}$ -NMR of  $\text{Ar}^*\text{SnN}(\text{Ad})\text{C}(\text{H})\text{O}$  in  $\text{C}_6\text{D}_6$  at RT

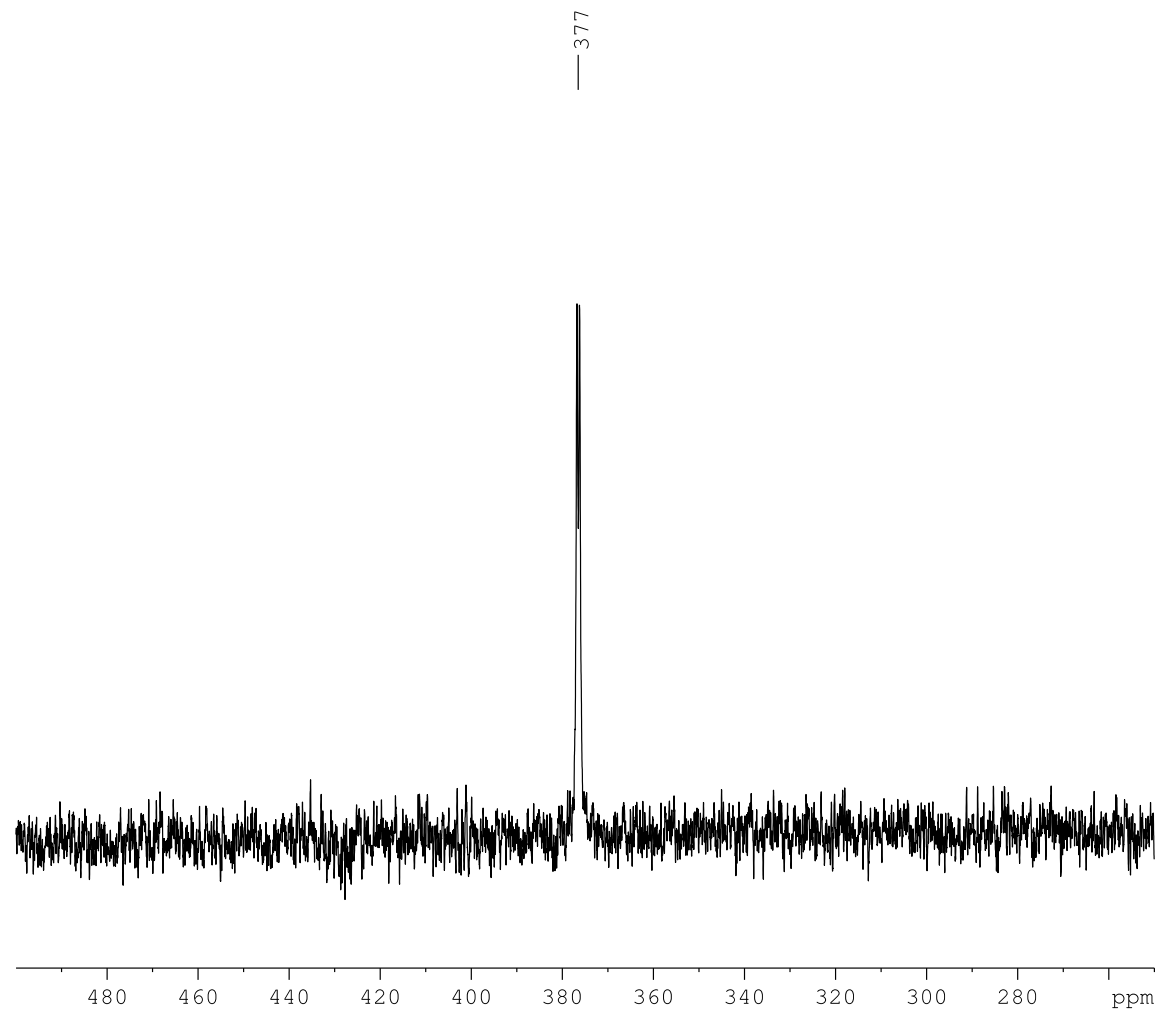

```
Current Data Parameters
NAME      MW153_250
EXPNO     11
PROCNO    1
```

```
F2 - Acquisition Parameters
Date_     20180827
Time      16.57
INSTRUM   spect
PROBHD    5 mm PABBO BB-
PULPROG   zg30
TD         32768
SOLVENT   C6D6
NS         4700
DS         0
SWH        74626.867 Hz
FIDRES     2.277431 Hz
AQ         0.2195456 sec
RG         14596.5
DW         6.700 usec
DE         5.50 usec
TE         299.2 K
D1         0.10000000 sec
TD0        1
```

```
===== CHANNEL f1 =====
NUC1      119Sn
P1        7.35 usec
PL1       0 dB
SFO1      93.3123680 MHz
```

```
F2 - Processing parameters
SI        65536
SF        93.2750580 MHz
WDW       EM
SSB       0
LB        8.00 Hz
GB        0
PC        3.00
```

Figure S11.  $^{119}\text{Sn}$  NMR spectrum of **3**

## NMR Data of compound 4

 $^1\text{H}$ -NMR of  $\text{Ar}^*\text{PbN}(\text{Ad})\text{C}(\text{H})\text{O}$  in  $\text{C}_6\text{D}_6$  at RT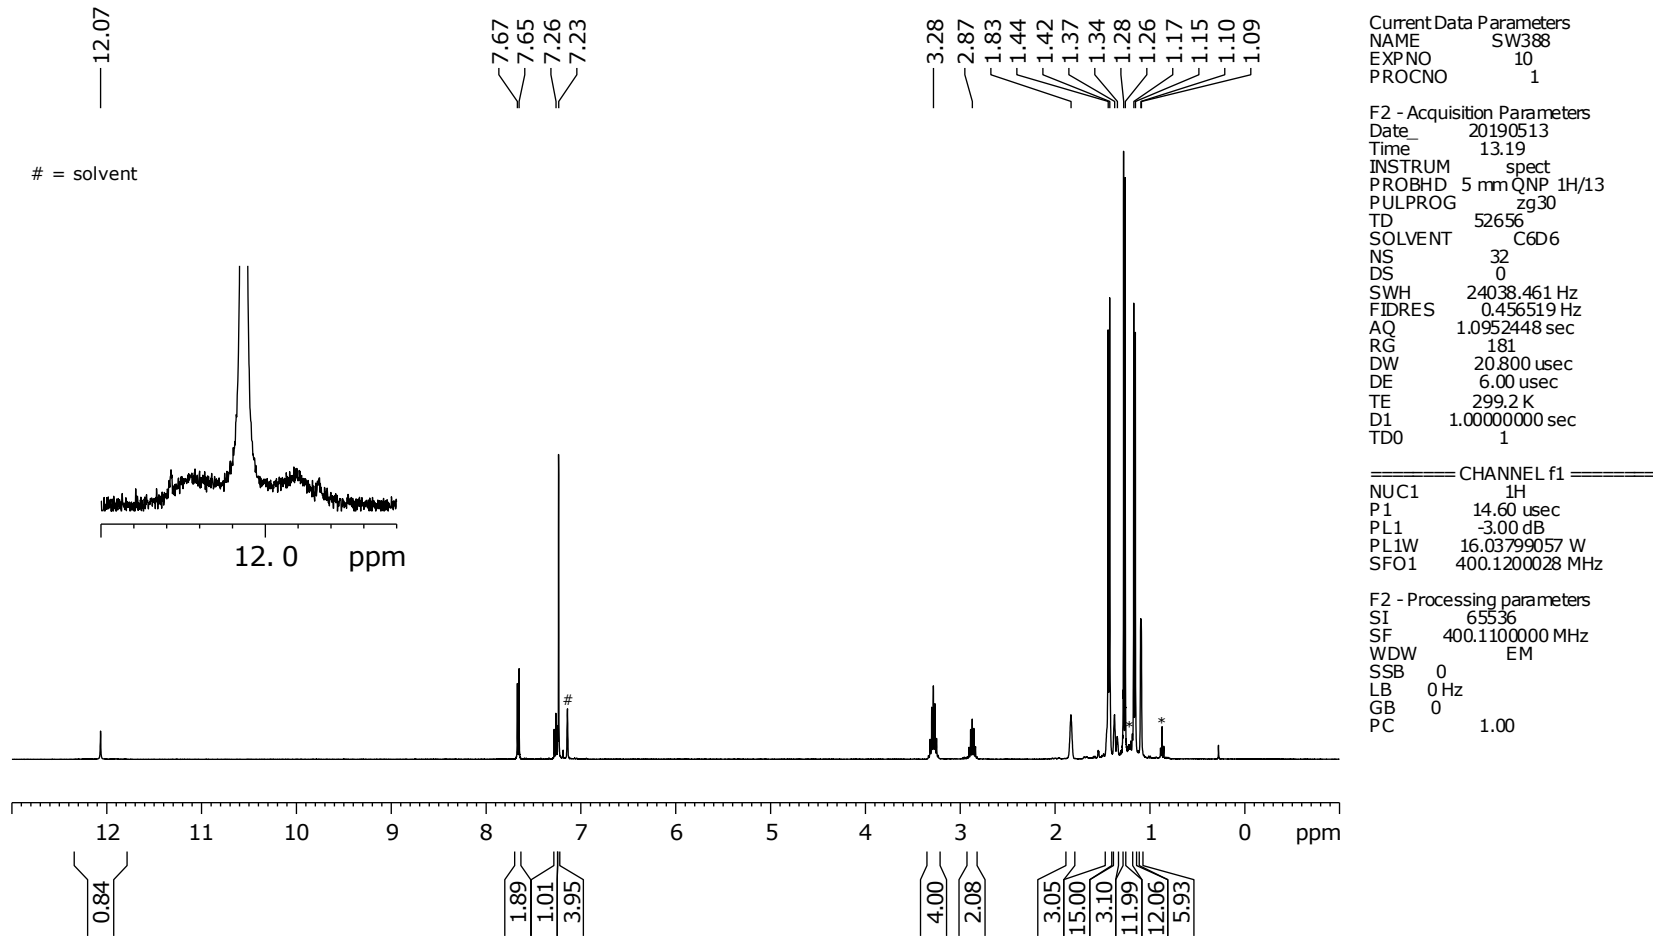Figure S12.  $^1\text{H}$  NMR spectrum of 4

$^{13}\text{C}$ -NMR of  $\text{Ar}^*\text{PbN(Ad)C(H)O}$  in  $\text{C}_6\text{D}_6$  at RT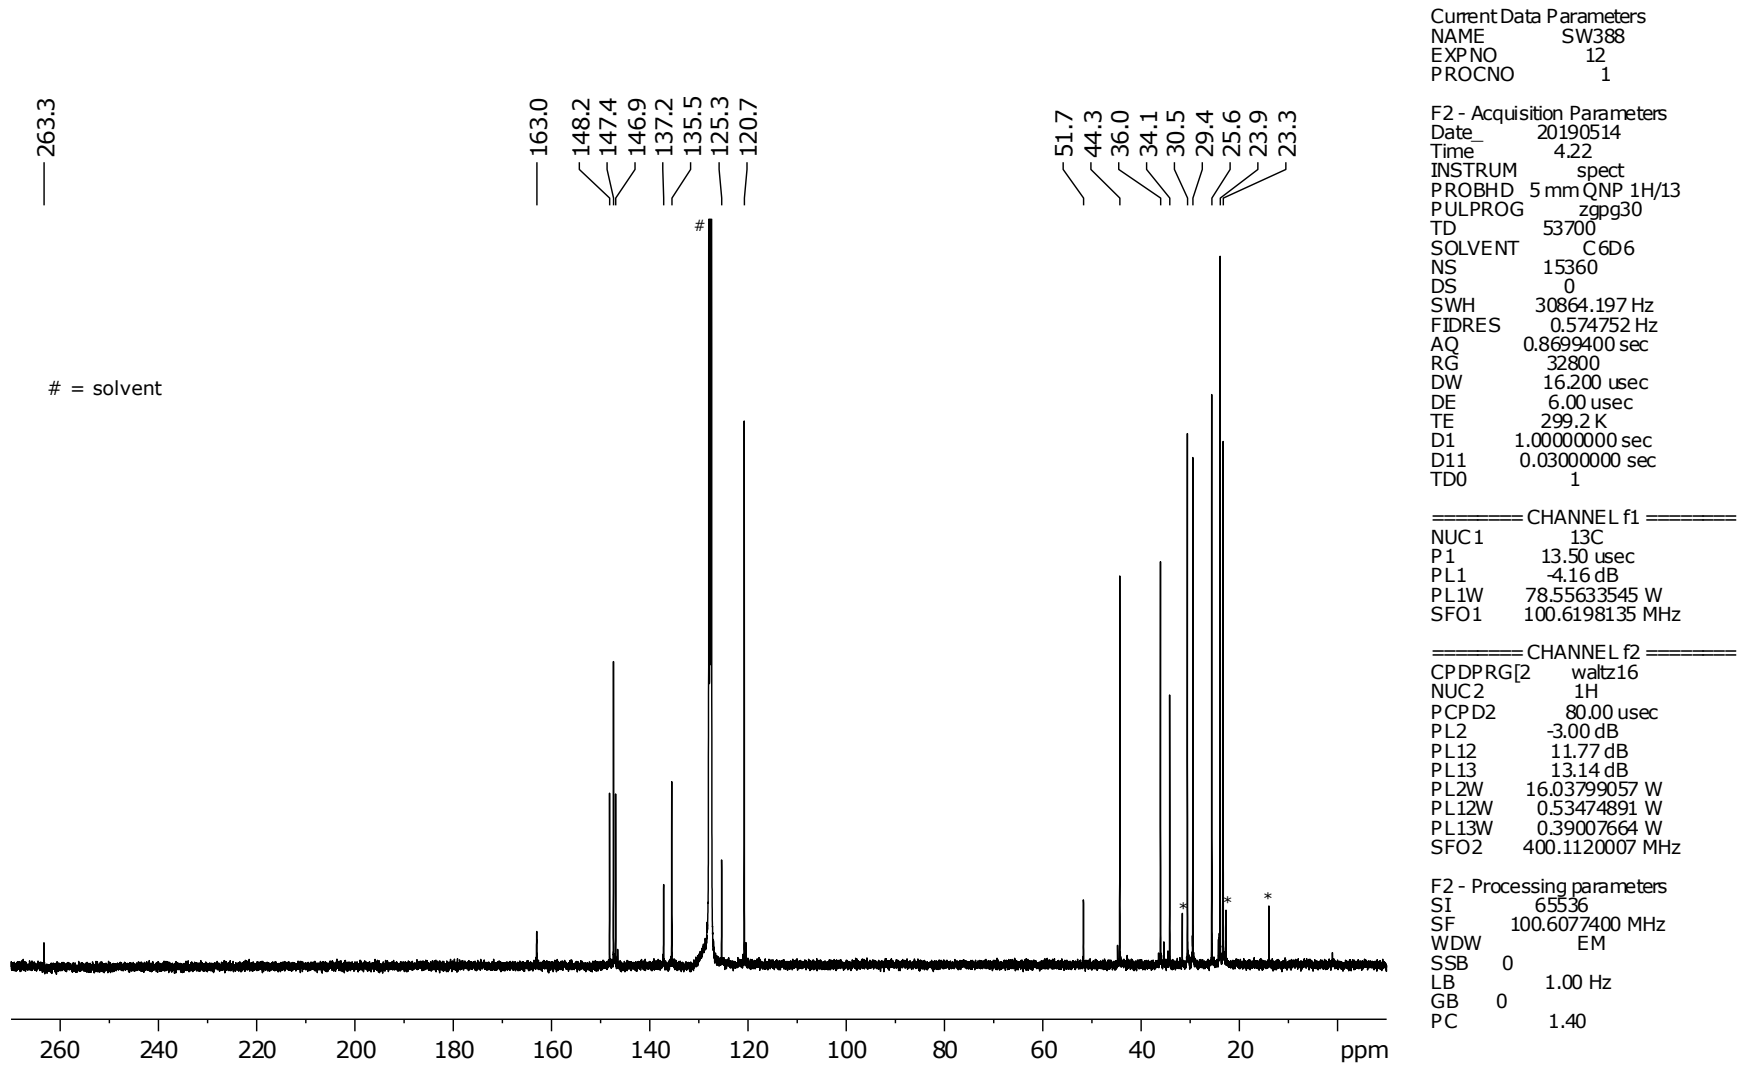Figure S13.  $^{13}\text{C}\{^1\text{H}\}$  NMR spectrum of **4**

$^{207}\text{Pb}$ -NMR of  $\text{Ar}^*\text{PbN}(\text{Ad})\text{C}(\text{H})\text{O}$  in  $\text{C}_6\text{D}_6$  at RT

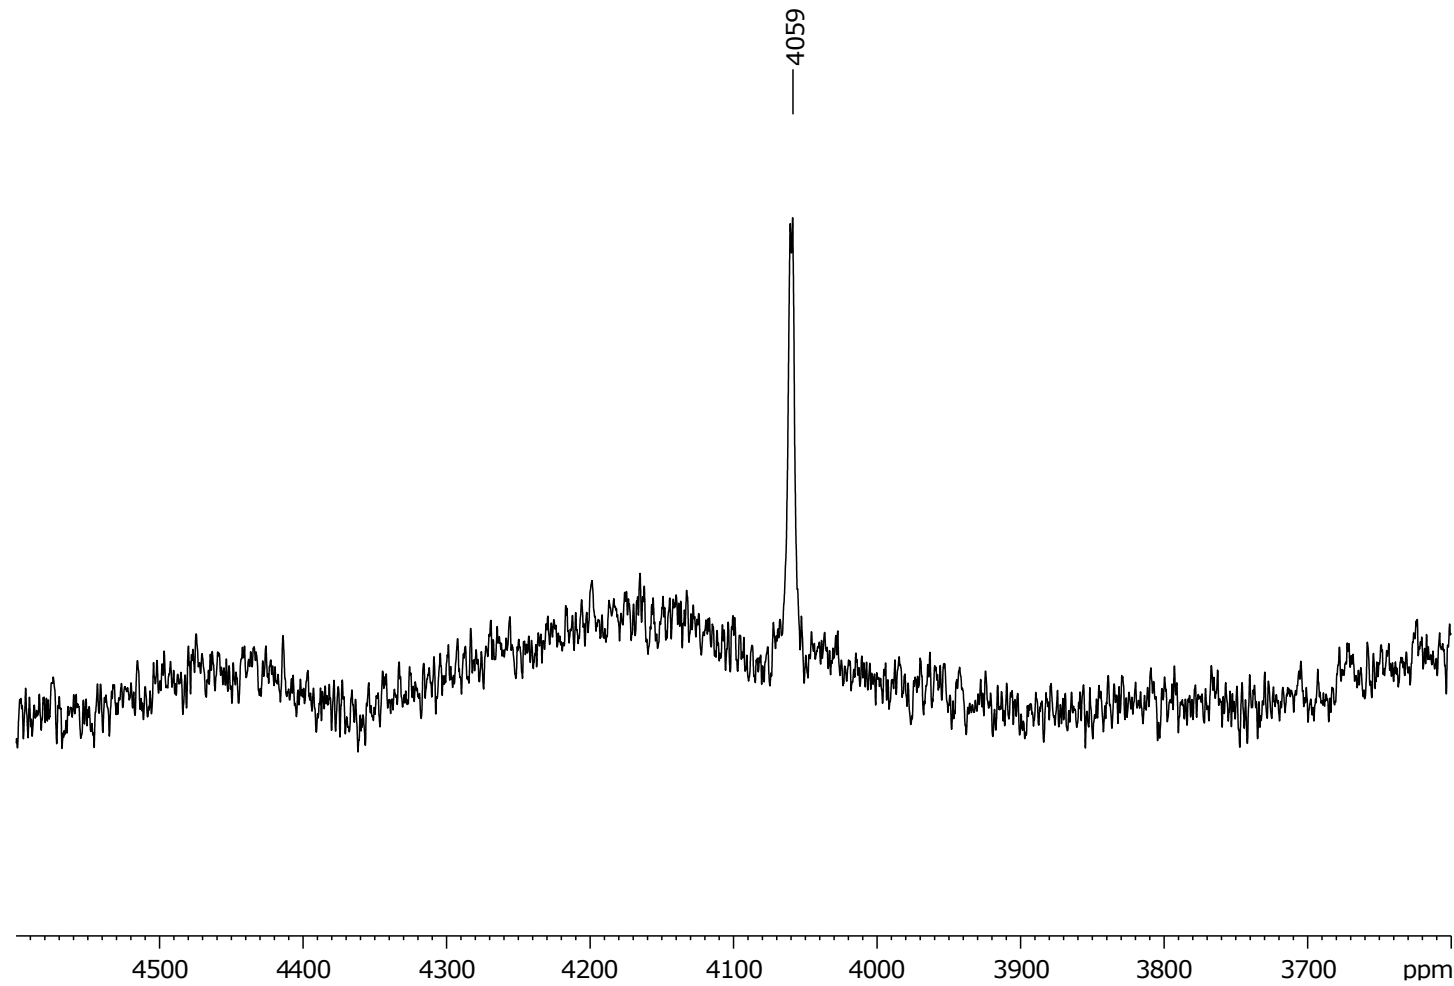

Figure S14.  $^{207}\text{Pb}$  NMR spectrum of **4**

Current Data Parameters

NAME SW388\_Pb  
EXPNO 13  
PROCNO 1

F2 - Acquisition Parameters

Date\_ 20190515  
Time 4.38 h  
INSTRUM spect  
PROBHD Z104275\_0338 (  
PULPROG zg30  
TD 14998  
SOLVENT C6D6  
NS 22528  
DS 0  
SWH 125000.000 Hz  
FIDRES 8.334445 Hz  
AQ 0.0599920 sec  
RG 204.67  
DW 4.000 usec  
DE 10.00 usec  
TE 298.0 K  
D1 0.20000000 sec  
TD0 1  
SFO1 63.0715443 MHz  
NUC1  $^{207}\text{Pb}$   
P1 12.50 usec  
PLW1 40.00000000 W

F2 - Processing parameters

SI 65536  
SF 62.7889938 MHz  
WDW EM  
SSB 0  
LB 50.00 Hz  
GB 0  
PC 3.00



## NMR Data of compound 5

 $^1\text{H}$ -NMR of  $\text{Ar}^*\text{Sn}(\text{H})\text{OC}(\text{H})\text{OSnAr}^*$  in  $\text{C}_6\text{D}_6$  at RT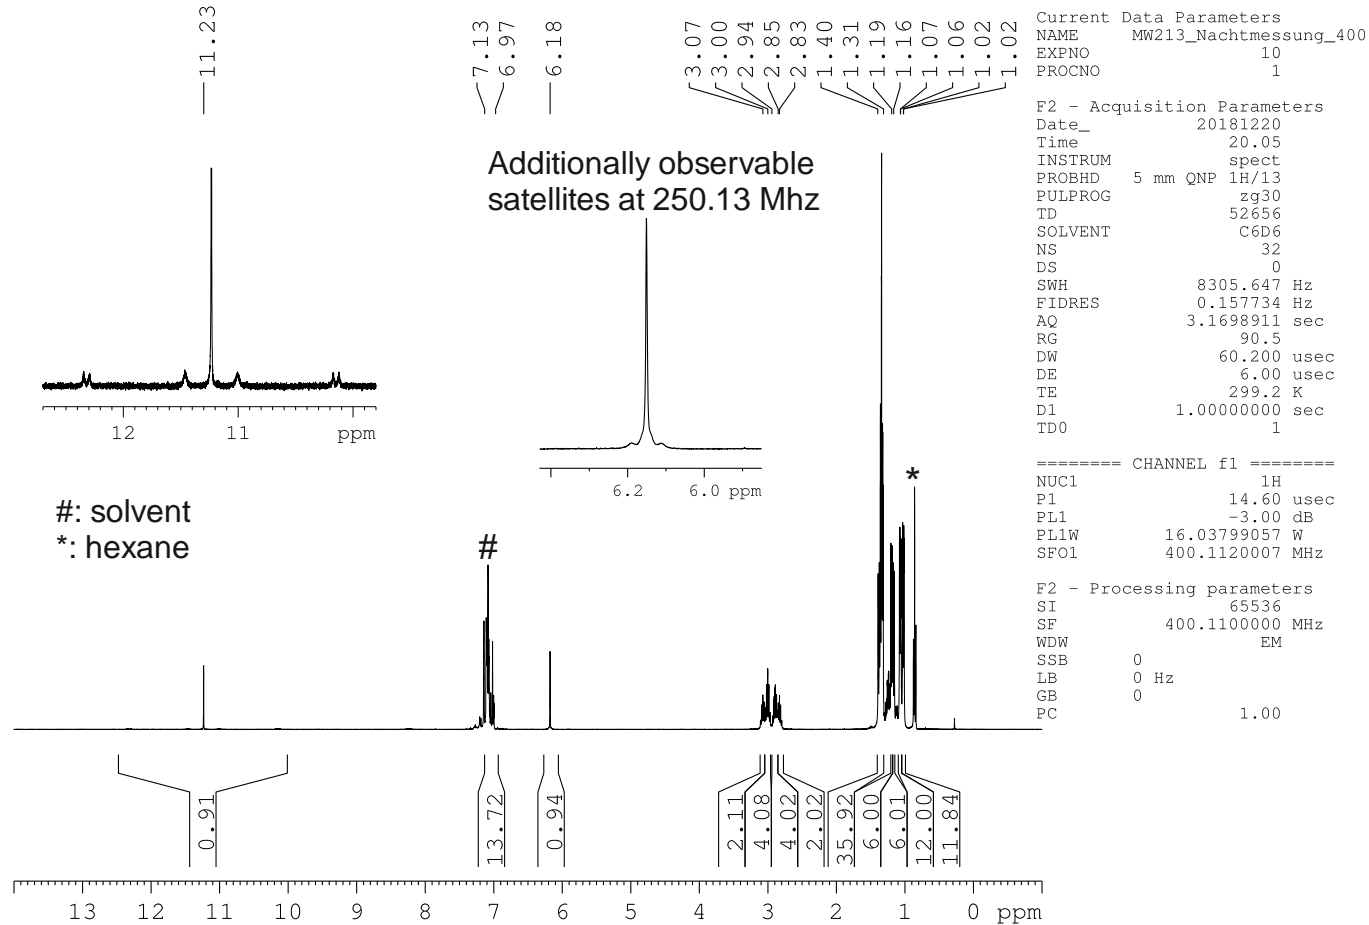Figure S15.  $^1\text{H}$  NMR spectrum of 5

$^{13}\text{C}\{^1\text{H}\}$ -NMR of Ar\*Sn(H)OC(H)OSnAr\* in  $\text{C}_6\text{D}_6$  at RT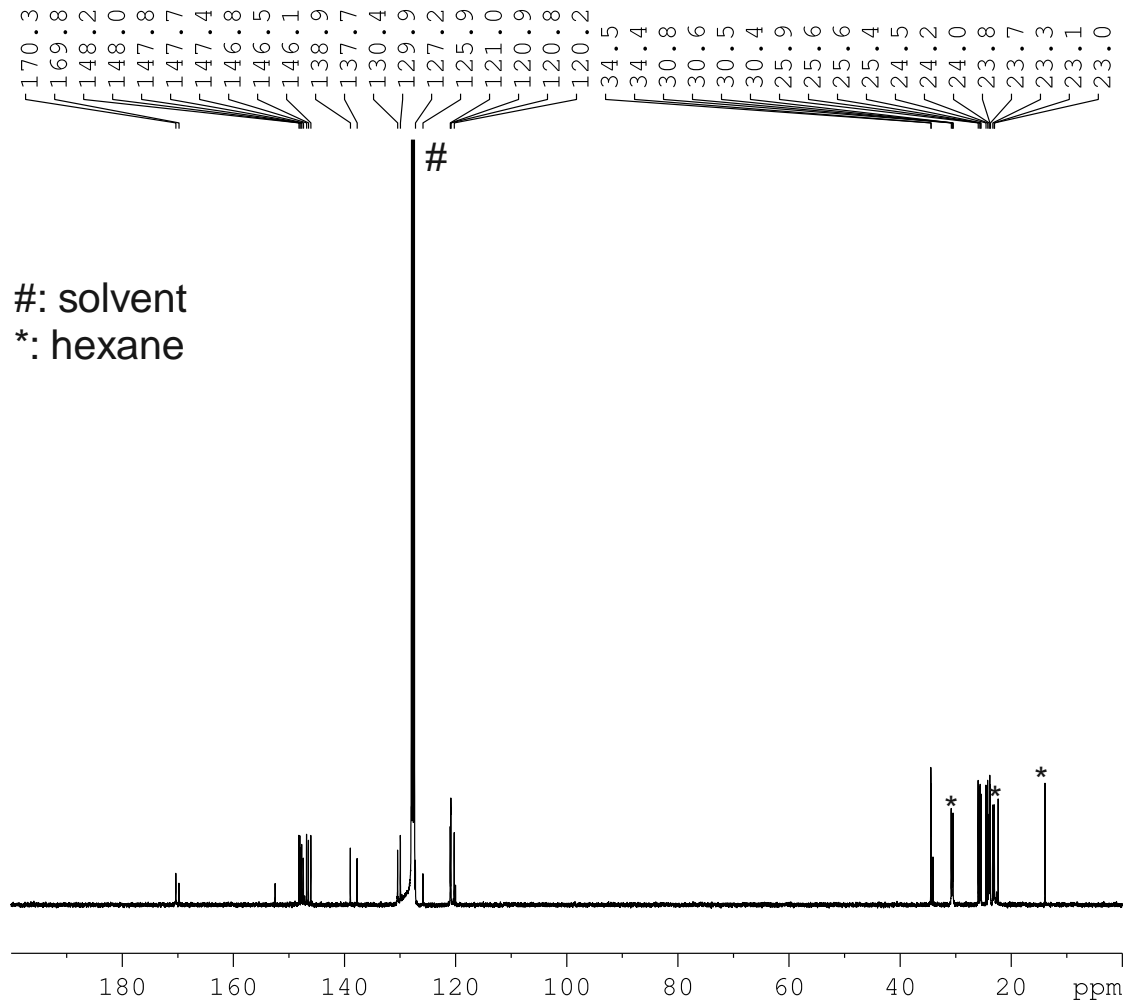

Current Data Parameters  
 NAME MW213\_Nachtmessung\_400  
 EXPNO 15  
 PROCNO 1

F2 - Acquisition Parameters  
 Date\_ 20181221  
 Time 6.26  
 INSTRUM spect  
 PROBHD 5 mm QNP 1H/13  
 PULPROG zgpg30  
 TD 53700  
 SOLVENT C6D6  
 NS 10240  
 DS 0  
 SWH 30864.197 Hz  
 FIDRES 0.574752 Hz  
 AQ 0.8699400 sec  
 RG 32800  
 DW 16.200 usec  
 DE 6.00 usec  
 TE 299.2 K  
 D1 1.00000000 sec  
 D11 0.03000000 sec  
 TDO 1

==== CHANNEL f1 =====  
 NUC1 13C  
 P1 13.50 usec  
 PL1 -4.16 dB  
 PL1W 78.55633545 W  
 SFO1 100.6198135 MHz

==== CHANNEL f2 =====  
 CPDPRG[2] waltz16  
 NUC2 1H  
 PCPD2 80.00 usec  
 PL2 -3.00 dB  
 PL12 11.77 dB  
 PL13 13.14 dB  
 PL2W 16.03799057 W  
 PL12W 0.53474891 W  
 PL13W 0.39007664 W  
 SFO2 400.1120007 MHz

F2 - Processing parameters  
 SI 65536  
 SF 100.6077400 MHz  
 WDW EM  
 SSB 0  
 LB 1.00 Hz  
 GB 0  
 PC 1.40

Figure S16.  $^{13}\text{C}\{^1\text{H}\}$  NMR spectrum of 5

$^{119}\text{Sn}$ -NMR of  $\text{Ar}^*\text{Sn}(\text{H})\text{OC}(\text{H})\text{OSnAr}^*$  in  $\text{C}_6\text{D}_6$  at RT

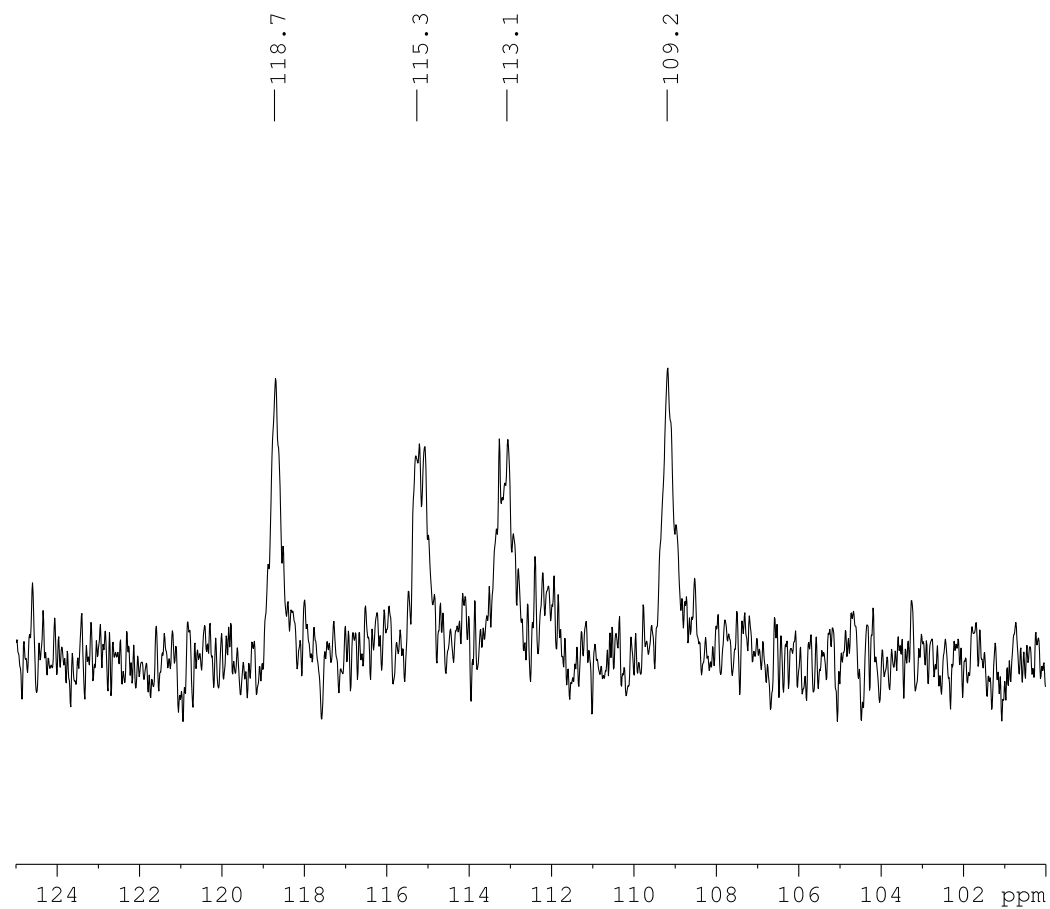

```
Current Data Parameters
NAME          MW213_250
EXPNO         13
PROCNO        1

F2 - Acquisition Parameters
Date_         20181025
Time          16.39
INSTRUM       spect
PROBHD        5 mm PABBO BB-
PULPROG       zg30
TD            32768
SOLVENT       C6D6
NS            4500
DS            0
SWH           74626.867 Hz
FIDRES        2.277431 Hz
AQ            0.2195456 sec
RG            14596.5
DW            6.700 usec
DE            5.50 usec
TE            299.2 K
D1            0.10000000 sec
TD0           1

===== CHANNEL f1 =====
NUC1          119Sn
P1            7.35 usec
PL1           0 dB
SFO1          93.3170318 MHz

F2 - Processing parameters
SI            65536
SF            93.2750580 MHz
WDW           EM
SSB           0
LB            3.00 Hz
GB            0
PC            3.00
```

Figure S17.  $^{119}\text{Sn}$  NMR spectrum of **5**

$^{119}\text{Sn}\{^1\text{H}\}$ -NMR of  $\text{Ar}^*\text{Sn}(\text{H})\text{OC}(\text{H})\text{OSnAr}^*$  in  $\text{C}_6\text{D}_6$  at RT

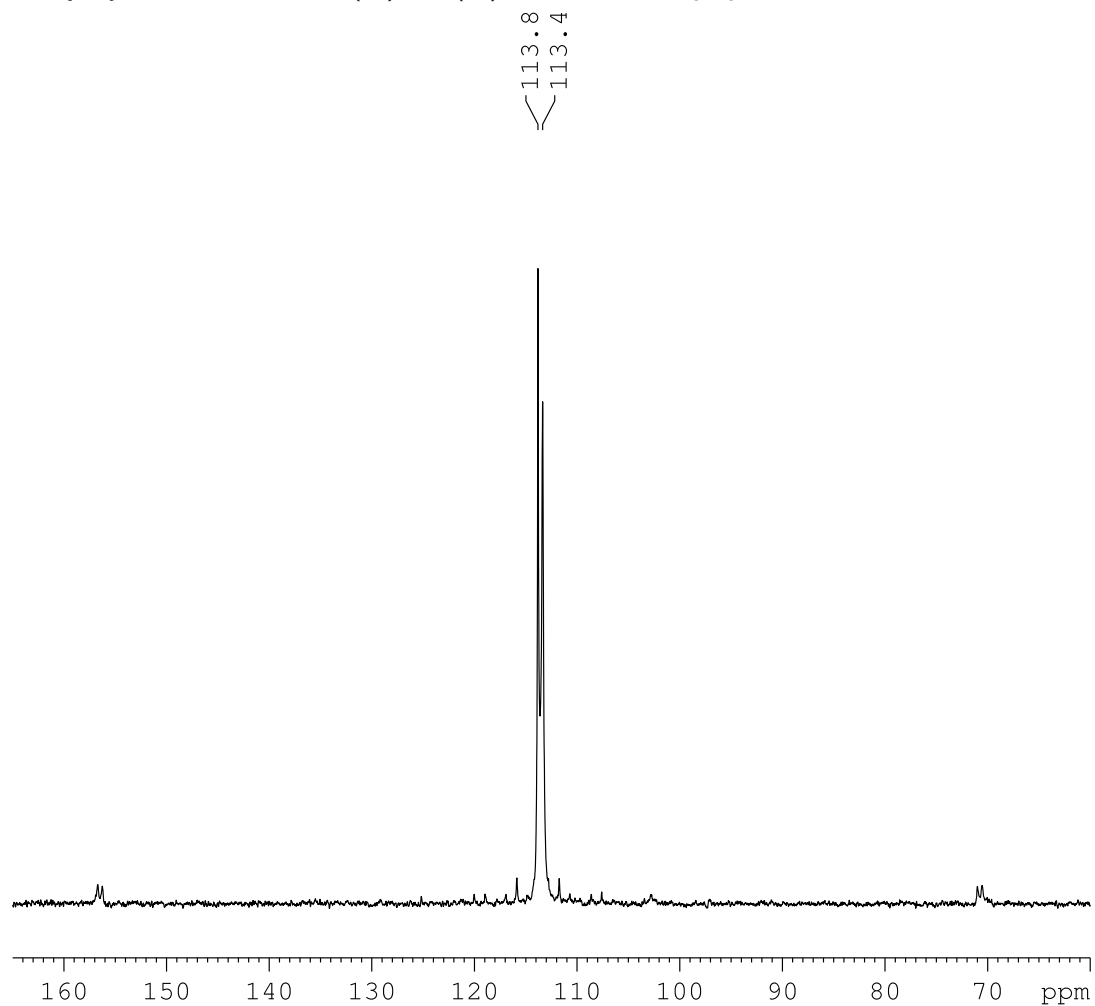

Current Data Parameters  
 NAME MW222\_300\_Nachtmessung  
 EXPNO 15  
 PROCNO 1

F2 - Acquisition Parameters  
 Date\_ 20190322  
 Time 4.10 h  
 INSTRUM spect  
 PROBHD Z104275\_0338 ( )  
 PULPROG zgig30  
 TD 39186  
 SOLVENT C6D6  
 NS 30720  
 DS 4  
 SWH 89285.711 Hz  
 FIDRES 2.278511 Hz  
 AQ 0.2194416 sec  
 RG 204.67  
 DW 5.600 usec  
 DE 6.50 usec  
 TE 298.0 K  
 D1 0.10000000 sec  
 D11 0.03000000 sec  
 TD0 1  
 SFO1 111.9315658 MHz  
 NUC1  $^{119}\text{Sn}$   
 P1 12.10 usec  
 PLW1 12.00000000 W  
 SFO2 300.1312005 MHz  
 NUC2  $^1\text{H}$   
 CPDPRG[2] waltz16  
 PCPD2 90.00 usec  
 PLW2 8.26509953 W  
 PLW12 0.19511271 W

F2 - Processing parameters  
 SI 65536  
 SF 111.9203738 MHz  
 WDW EM  
 SSB 0  
 LB 5.00 Hz  
 GB 0  
 PC 1.40

Figure S18.  $^{119}\text{Sn}\{^1\text{H}\}$  NMR spectrum of **5**

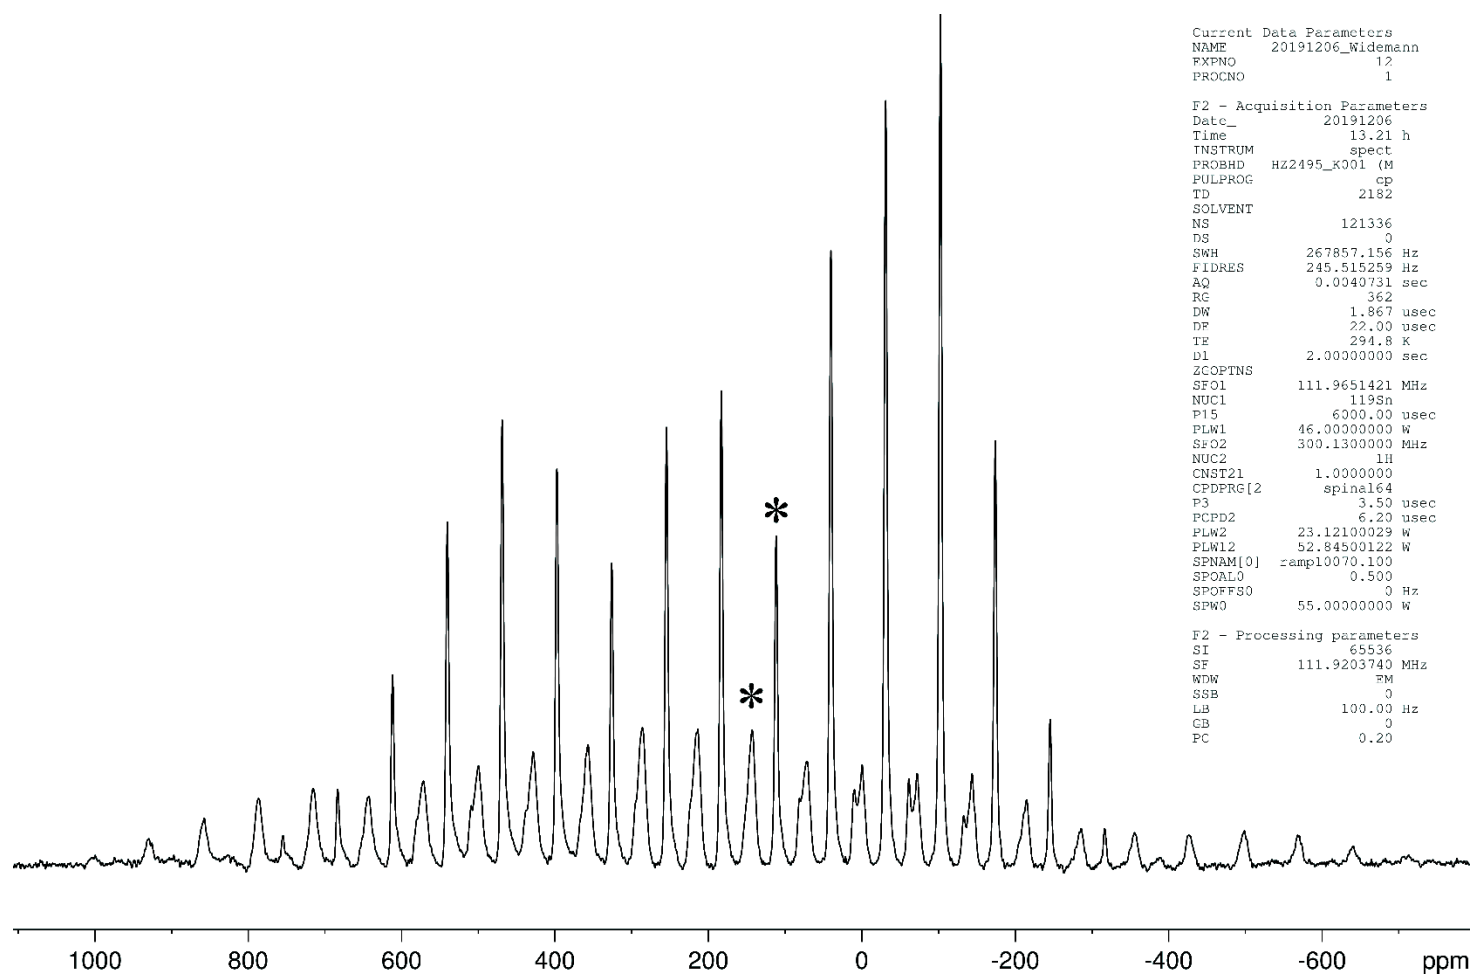

Figure S19. 111.9 MHz  $^{119}\text{Sn}$  CP/MAS NMR spectrum of **5** obtained at a spinning rate of 8 kHz. The isotropic peaks are indicated by asterisks. Sn-H:  $\delta_{\text{iso}} = 112$ ,  $\delta_{11} = 658(8)$ ,  $\delta_{22} = -62(6)$ ,  $\delta_{33} = -261(6)$ , span  $\Omega = 919(5)$ , skew  $\kappa = -0.57(2)$ ; Sn H-free:  $\delta_{\text{iso}} = 146$ ,  $\delta_{11} = 885(29)$ ,  $\delta_{22} = 218(20)$ ,  $\delta_{33} = -665(21)$ , span  $\Omega = 1550(11)$ , skew  $\kappa = 0.14(4)$ . The splittings in the spinning sidebands of the broader, H-free species visible in the region 0 to -200 ppm are ascribed to overlap with satellites due to  $^1J_{\text{Sn-119,Sn-117,119}}$  coupling (ca. 9200 Hz) associated with the strongest spinning sidebands of the Sn-H species, resulting in greater errors in the spinning sideband analysis.

S22

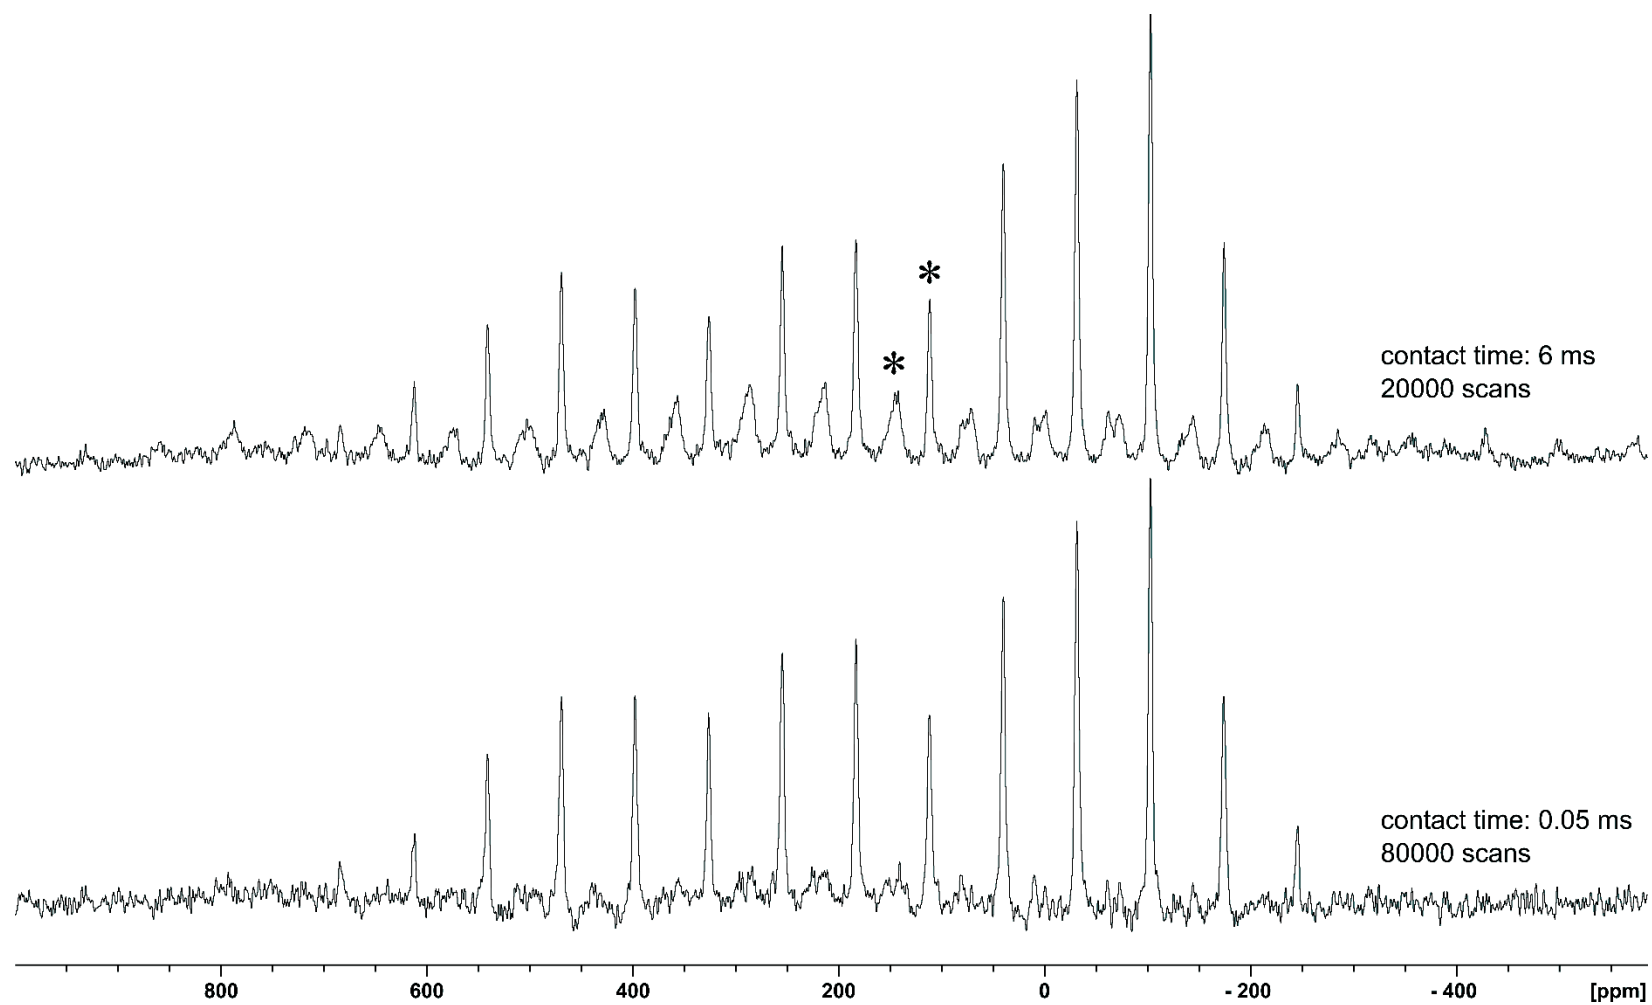

Figure S20. 111.9 MHz variable contact time  $^{119}\text{Sn}$  CP/MAS NMR spectra of **5** obtained at a spinning rate of 8 kHz. The isotropic peaks are indicated by asterisks. The upper spectrum was obtained after a contact time of 6 ms, the lower spectrum used a very short contact time of 0.05 ms to basically eliminate the contribution of the proton free Sn atom. NQS (non-quaternary suppression) experiments<sup>1</sup> turned out inconclusive.

## NMR Data of compound 6

<sup>1</sup>H-NMR of Ar\*Sn(H)2C(S)2SnAr\* in C<sub>6</sub>D<sub>6</sub> at RT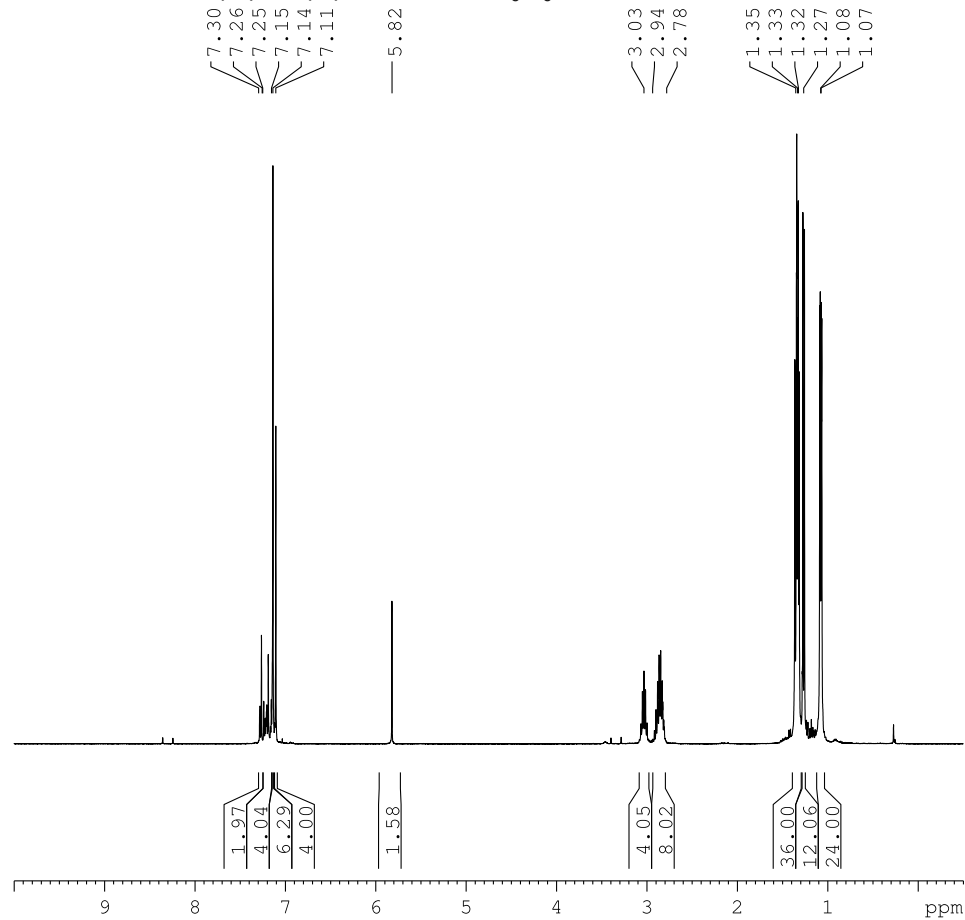

Current Data Parameters  
 NAME MW262\_400\_Nachtmessung\_50mg  
 EXPNO 10  
 PROCNO 1

F2 - Acquisition Parameters  
 Date\_ 20190208  
 Time 20.04  
 INSTRUM spect  
 PROBHD 5 mm QNP 1H/13  
 PULPROG zg30  
 TD 52656  
 SOLVENT C6D6  
 NS 16  
 DS 0  
 SWH 8305.647 Hz  
 FIDRES 0.157734 Hz  
 AQ 3.1698911 sec  
 RG 57  
 DW 60.200 usec  
 DE 6.00 usec  
 TE 299.2 K  
 D1 1.00000000 sec  
 TD0 1

===== CHANNEL f1 =====  
 NUC1 1H  
 P1 14.60 usec  
 PL1 -3.00 dB  
 PL1W 16.03799057 W  
 SFO1 400.1120007 MHz

F2 - Processing parameters  
 SI 65536  
 SF 400.1100000 MHz  
 WDW EM  
 SSB 0  
 LB 0 Hz  
 GB 0  
 PC 1.00

Figure S21. <sup>1</sup>H NMR spectrum of 6

$^{13}\text{C}\{^1\text{H}\}$ -NMR of  $\text{Ar}^*\text{Sn}(\text{H})_2\text{C}(\text{S})_2\text{SnAr}^*$  in  $\text{C}_6\text{D}_6$  at RT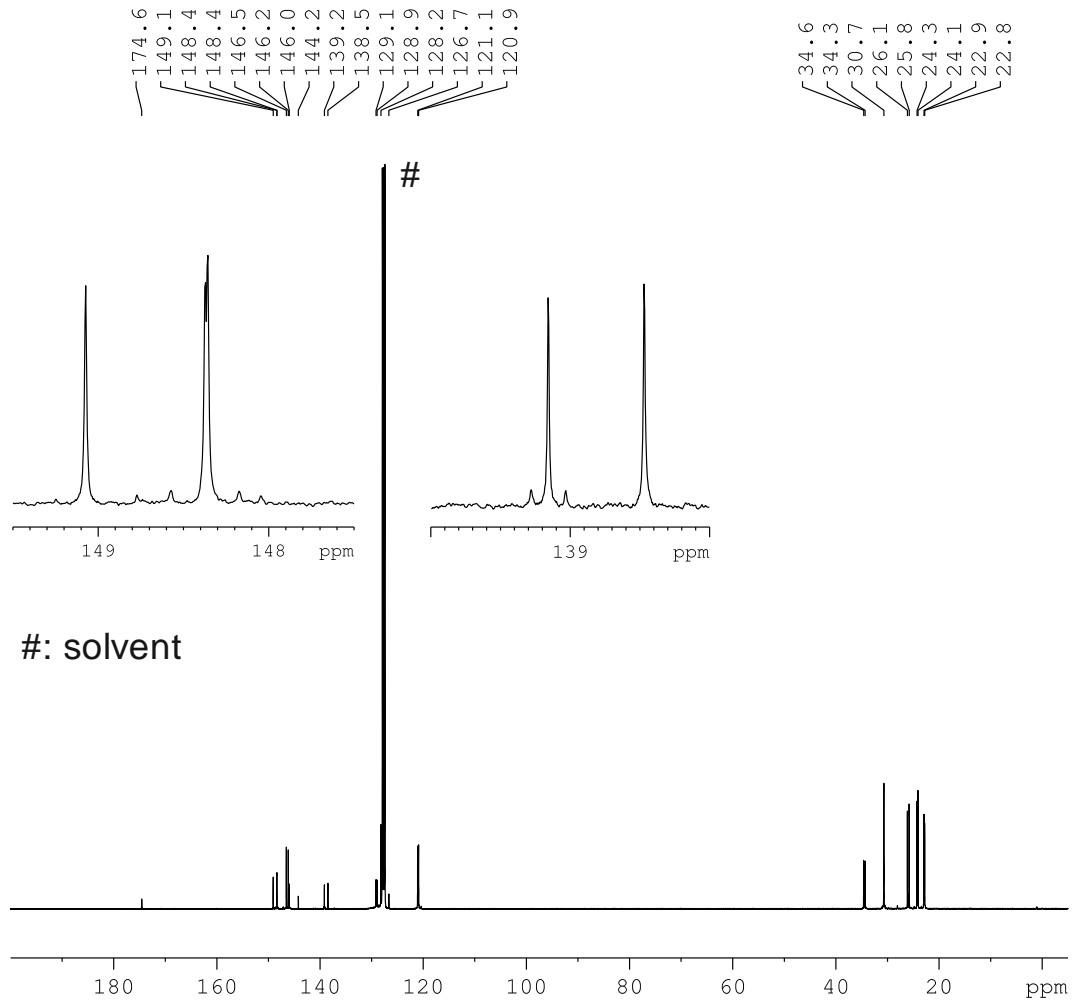

Current Data Parameters  
 NAME MW262\_400\_Nachtmessung\_50mg  
 EXPNO 16  
 PROCNO 1

F2 - Acquisition Parameters  
 Date\_ 20190209  
 Time 0.46  
 INSTRUM spect  
 PROBHD 5 mm QNP 1H/13  
 PULPROG zgpg30  
 TD 53700  
 SOLVENT C6D6  
 NS 15360  
 DS 0  
 SWH 30864.197 Hz  
 FIDRES 0.574752 Hz  
 AQ 0.8699400 sec  
 RG 32800  
 DW 16.200 usec  
 DE 6.00 usec  
 TE 299.2 K  
 D1 1.00000000 sec  
 D11 0.03000000 sec  
 TD0 1

===== CHANNEL f1 =====  
 NUC1 13C  
 P1 13.50 usec  
 PL1 -4.16 dB  
 PL1W 78.55633545 W  
 SFO1 100.6198135 MHz

===== CHANNEL f2 =====  
 CPDPRG[2] waltz16  
 NUC2 1H  
 PCPD2 80.00 usec  
 PL2 -3.00 dB  
 PL12 11.77 dB  
 PL13 13.14 dB  
 PL2W 16.03799057 W  
 PL12W 0.53474891 W  
 PL13W 0.39007664 W  
 SFO2 400.1120007 MHz

F2 - Processing parameters  
 SI 65536  
 SF 100.6077400 MHz  
 WDW EM  
 SSB 0  
 LB 1.00 Hz  
 GB 0  
 PC 1.40

Figure S22.  $^{13}\text{C}\{^1\text{H}\}$  NMR spectrum of **6**



$^{119}\text{Sn}$ -NMR of  $\text{Ar}^*\text{Sn}(\text{H})_2\text{C}(\text{S})_2\text{SnAr}^*$  in  $\text{C}_6\text{D}_6$  at RT

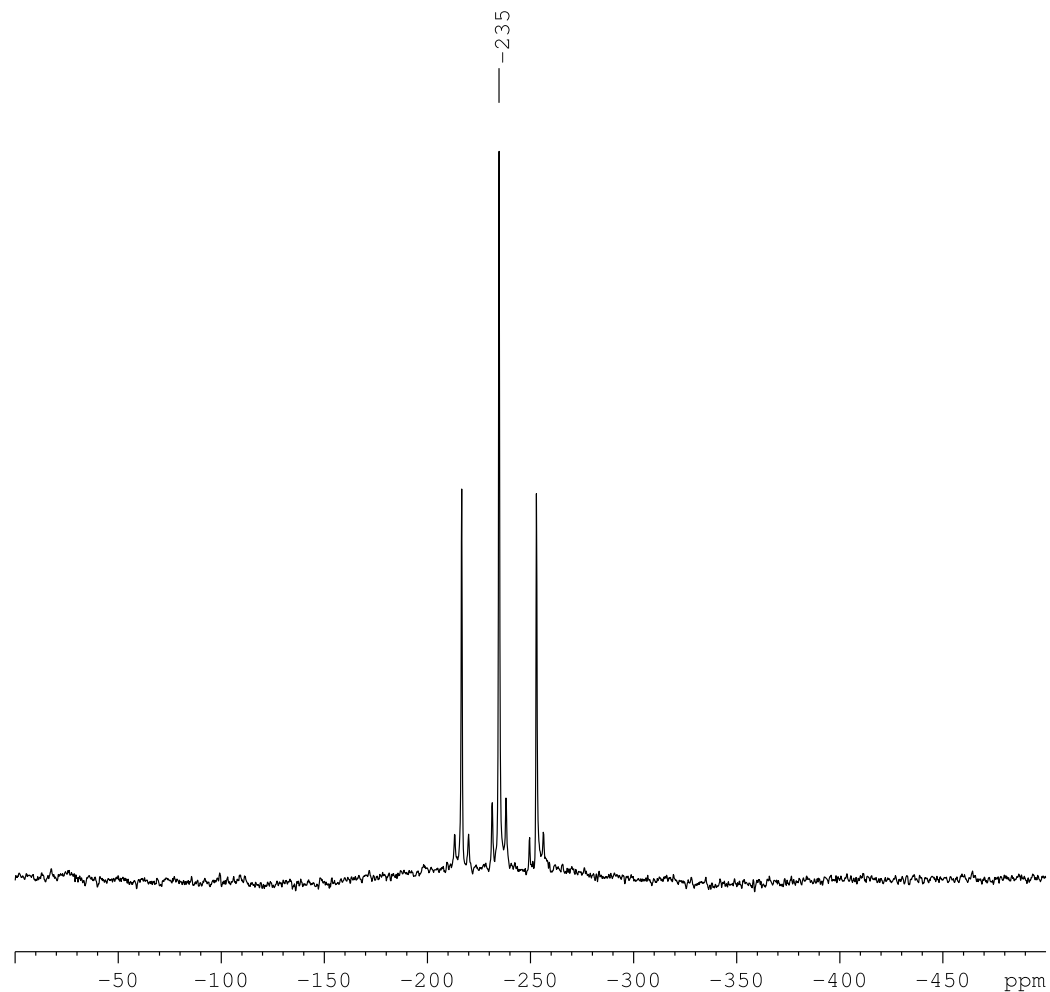

Current Data Parameters  
NAME MW262\_300\_Nachtmessung\_50mg  
EXPNO 11  
PROCNO 1

F2 - Acquisition Parameters  
Date\_ 20190212  
Time 0.53 h  
INSTRUM spect  
PROBHD z104275\_0338 (  
PULPROG zg30  
TD 11264  
SOLVENT C6D6  
NS 179200  
DS 1  
SWH 89285.711 Hz  
FIDRES 7.926644 Hz  
AQ 0.0630784 sec  
RG 204.67  
DW 5.600 usec  
DE 6.50 usec  
TE 298.0 K  
D1 0.02000000 sec  
TD0 1  
SFO1 111.8979900 MHz  
NUC1 119Sn  
P1 12.10 usec  
PLW1 12.00000000 W

F2 - Processing parameters  
SI 4096  
SF 111.9203740 MHz  
WDW EM  
SSB 0  
LB 40.00 Hz  
GB 0  
PC 1.40

Figure S23.  $^{119}\text{Sn}$  NMR spectrum of **6**

$^{119}\text{Sn}$ -NMR of  $\text{Ar}^*\text{Sn}(\text{H})_2\text{C}(\text{S})_2\text{SnAr}^*$  in  $\text{C}_6\text{D}_6$  at RT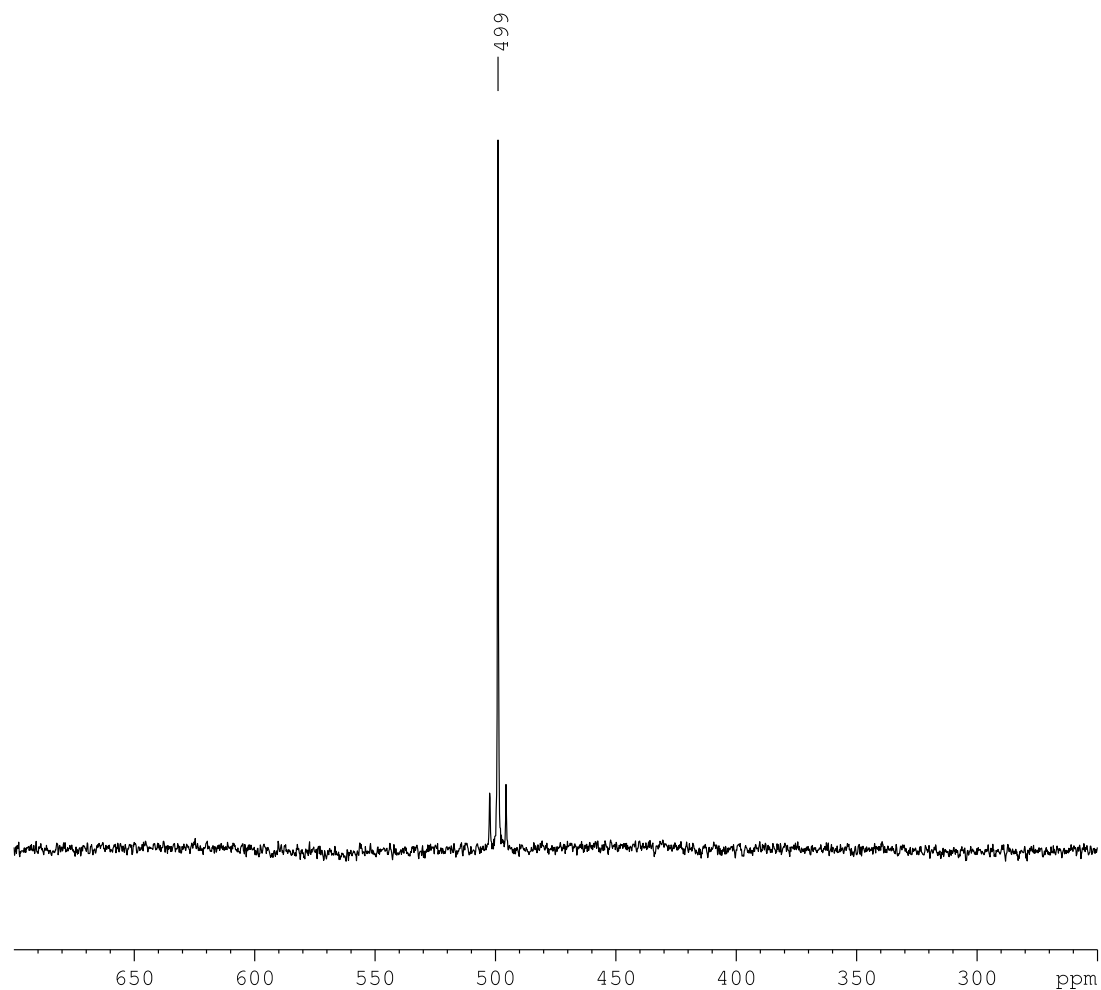

Current Data Parameters  
NAME MW242\_300\_Nachtmessung  
EXPNO 12  
PROCNO 1

F2 - Acquisition Parameters  
Date\_ 20190201  
Time 23.41 h  
INSTRUM spect  
PROBHD Z104275\_0338 (  
PULPROG zg30  
TD 5120  
SOLVENT C6D6  
NS 122880  
DS 1  
SWH 89285.711 Hz  
FIDRES 17.438616 Hz  
AQ 0.0286720 sec  
RG 204.67  
DW 5.600 usec  
DE 6.50 usec  
TE 298.0 K  
D1 0.02000000 sec  
TD0 1  
SF01 111.9763340 MHz  
NUC1  $^{119}\text{Sn}$   
P1 12.10 usec  
PLW1 12.00000000 W

F2 - Processing parameters  
SI 4096  
SF 111.9203740 MHz  
WDW EM  
SSB 0  
LB 20.00 Hz  
GB 0  
PC 1.40

Figure S24.  $^{119}\text{Sn}$  NMR spectrum of **6**

NMR Data of compound **7** $^1\text{H}$ -NMR of  $(\text{Ar}^*\text{PbS})_2\text{CH}_2$  in  $\text{C}_6\text{D}_6$  at RT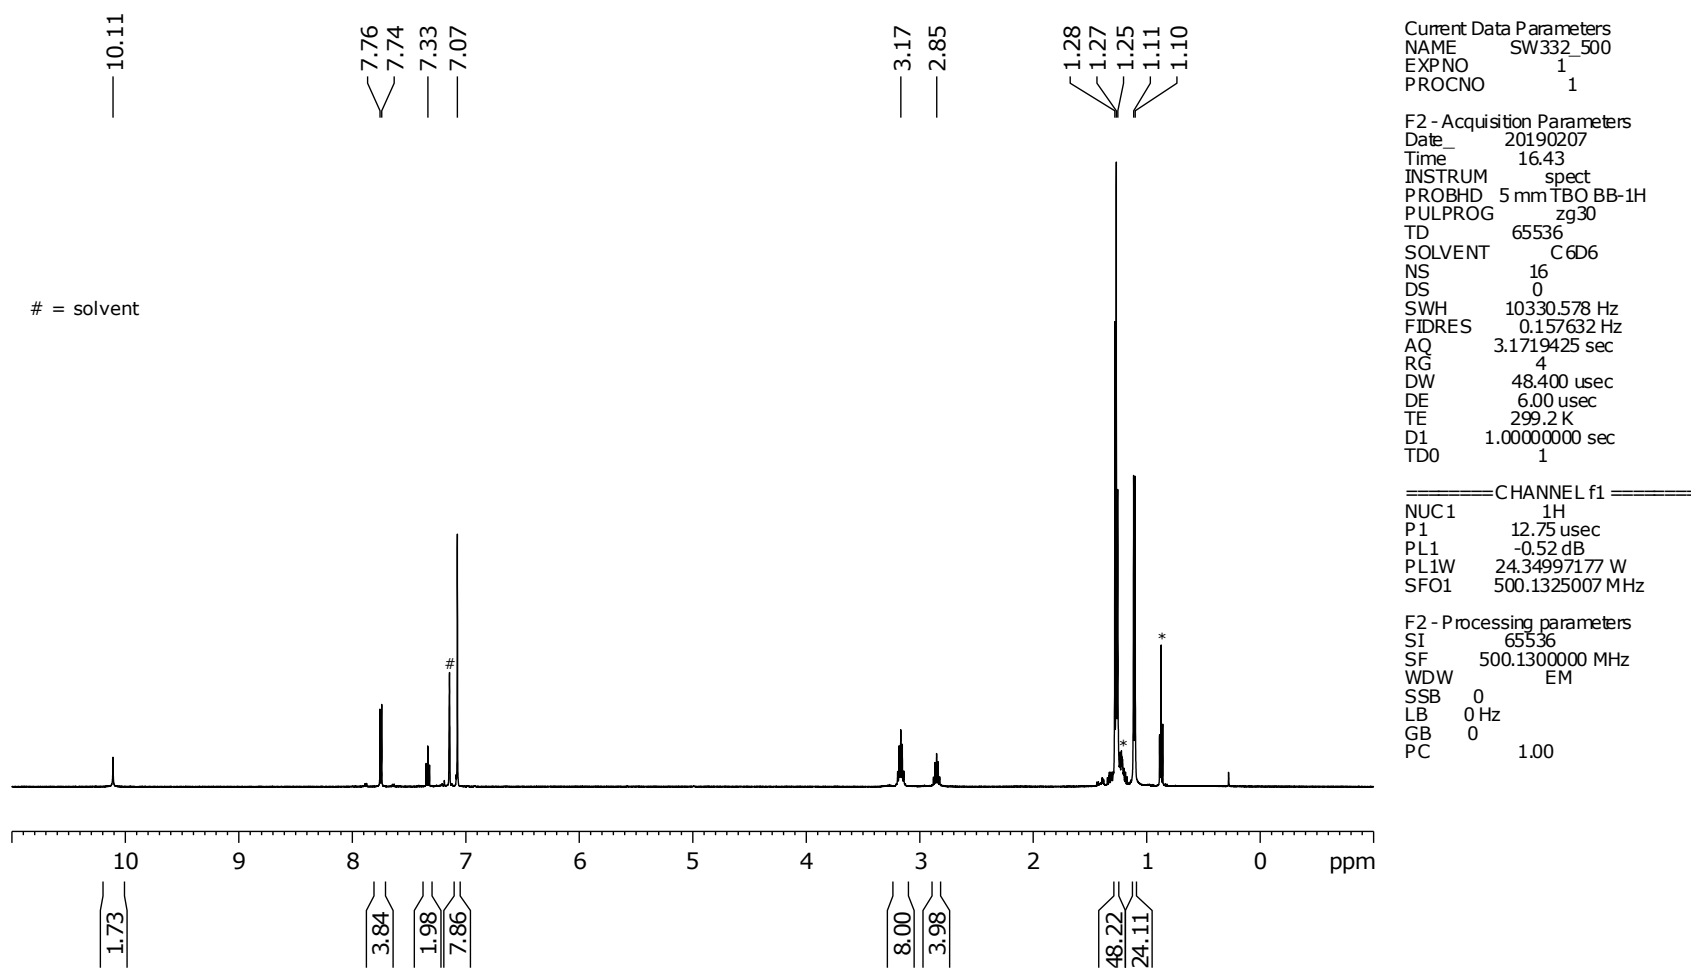Figure S25.  $^1\text{H}$  NMR spectrum of **7**

$^{13}\text{C}$ -NMR of  $(\text{Ar}^*\text{PbS})_2\text{CH}_2$  in Tol- $d_8$  at RT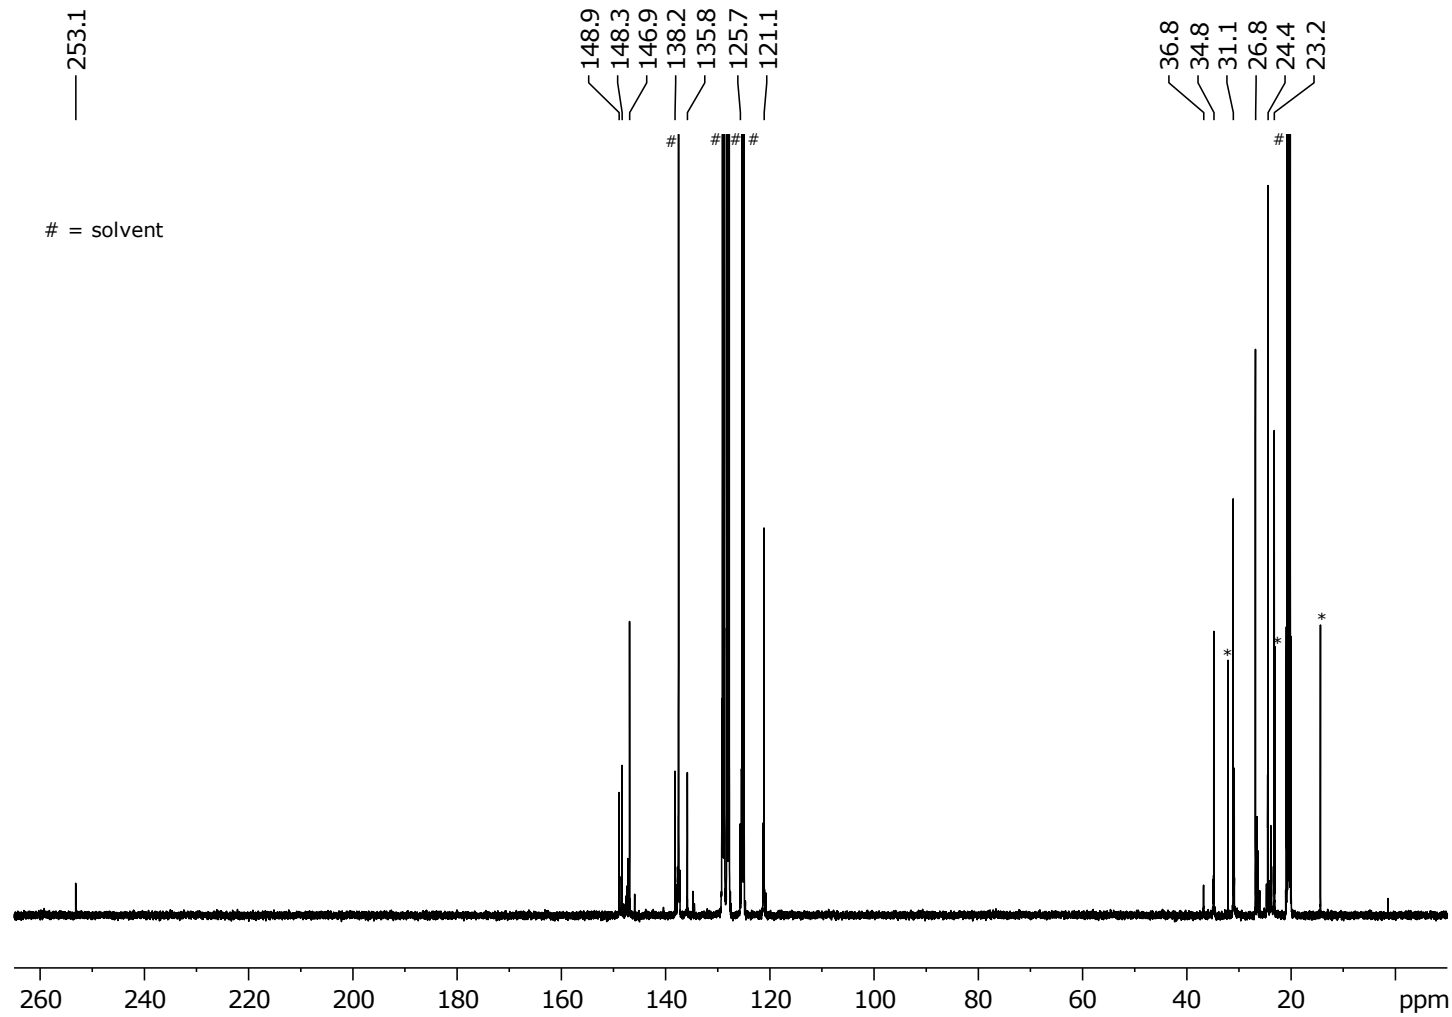Figure S26.  $^{13}\text{C}\{^1\text{H}\}$  NMR spectrum of **7**

Current Data Parameters  
 NAME SW417\_500 - Kopie  
 EXPNO 12  
 PROCNO 1

F2 - Acquisition Parameters  
 Date\_ 20190606  
 Time 23.16  
 INSTRUM spect  
 PROBHD 5 mm TBO BB-1H  
 PULPROG zgpg30  
 TD 65536  
 SOLVENT Tol  
 NS 20480  
 DS 0  
 SWH 37878.789 Hz  
 FIDRES 0.577984 Hz  
 AQ 0.8650752 sec  
 RG 2050  
 DW 13.200 usec  
 DE 6.00 usec  
 TE 299.2 K  
 D1 1.0000000 sec  
 D11 0.03000000 sec  
 TD0 1

===== CHANNEL f1 =====  
 NUC1 13C  
 P1 11.00 usec  
 PL1 0 dB  
 PL1W 83.89700317 W  
 SFO1 125.7728799 MHz

===== CHANNEL f2 =====  
 CPDPRG[2] waltz16  
 NUC2 1H  
 PCPD2 80.00 usec  
 PL2 0 dB  
 PL12 16.94 dB  
 PL13 21.51 dB  
 PL2W 21.60222244 W  
 PL12W 0.43701705 W  
 PL13W 0.15258029 W  
 SFO2 500.1325007 MHz

F2 - Processing parameters  
 SI 65536  
 SF 125.7577396 MHz  
 WDW EM  
 SSB 0  
 LB 1.00 Hz  
 GB 0  
 PC 1.40

$^{207}\text{Pb}$ -NMR of  $(\text{Ar}^*\text{PbS})_2\text{CH}_2$  in Tol- $d_8$  at RT

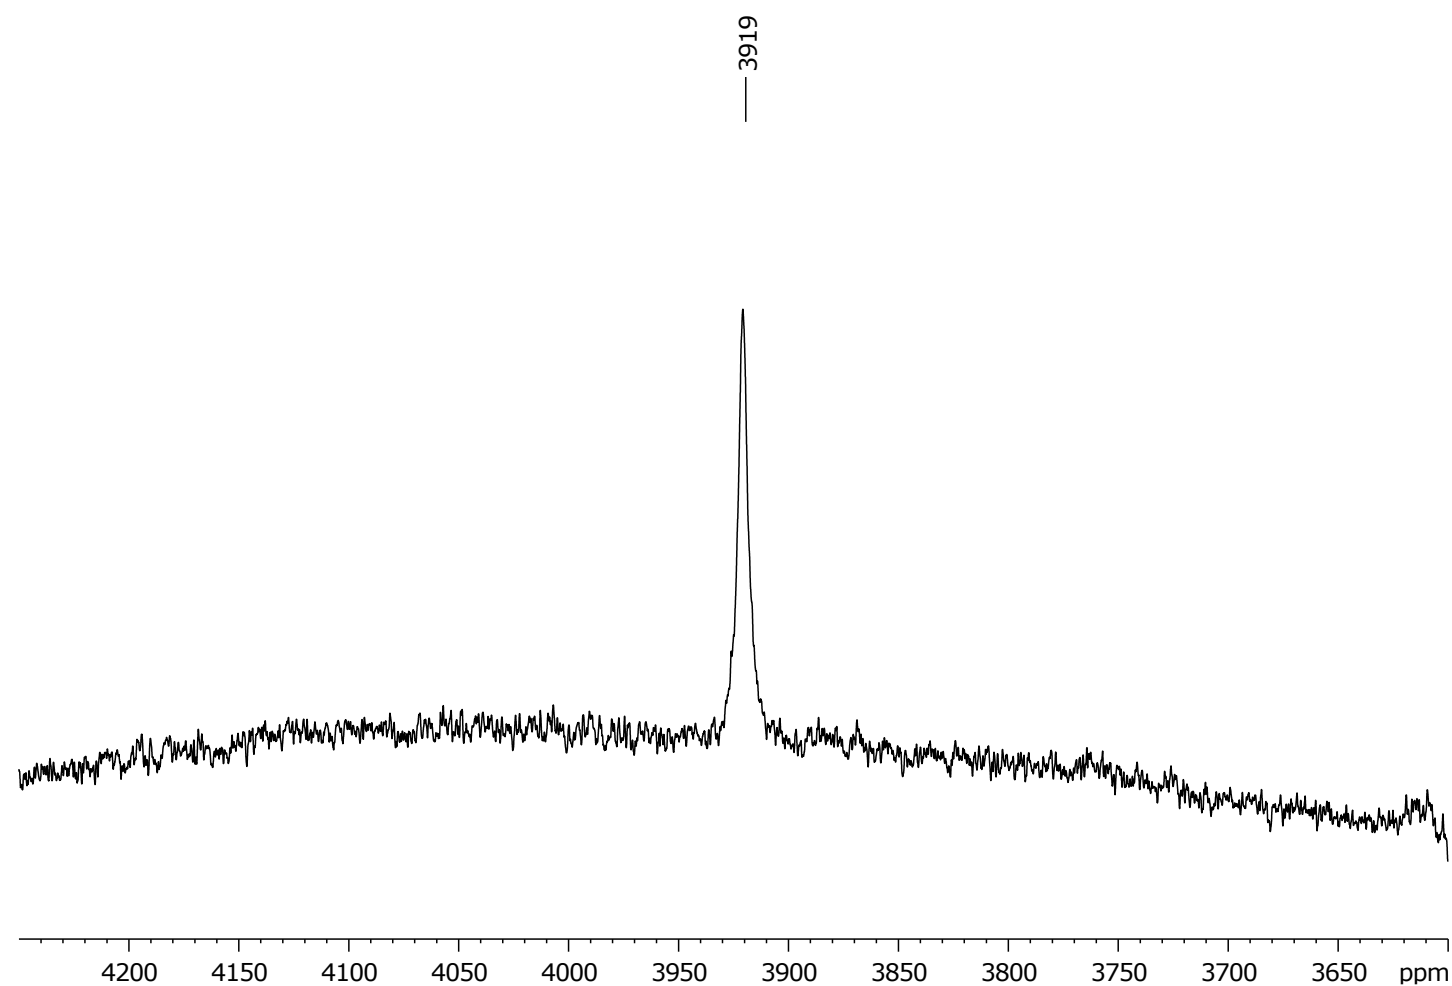

Figure S27.  $^{207}\text{Pb}$  NMR spectrum of **7**

Current Data Parameters

NAME SW413\_500  
EXPNO 11  
PROCNO 1

F2 - Acquisition Parameters

Date\_ 20190523  
Time 2.26  
INSTRUM spect  
PROBHD 5 mm TBO BB-1H  
PULPROG zg30  
TD 15608  
SOLVENT Tol  
NS 56320  
DS 0  
SWH 208333.328 Hz  
FIDRES 13.347856 Hz  
AQ 0.0374592 sec  
RG 2050  
DW 2.400 usec  
DE 17.40 usec  
TE 299.2 K  
D1 0.05000000 sec  
TD0 1

===== CHANNEL f1 =====

NUC1  $^{207}\text{Pb}$   
P1 9.50 usec  
PL1 0 dB  
SFO1 105.1010279 MHz

F2 - Processing parameters

SI 131072  
SF 104.6301920 MHz  
WDW EM  
SSB 0  
LB 50.00 Hz  
GB 0  
PC 1.40

## Quantum chemical calculations

On the basis of the molecular structure of **5** determined in the solid state the structure was optimized using the programme Orca4.2<sup>2, 3</sup> with BP86,<sup>4, 5</sup> Grimme's dispersion correction and Becke-Johnson damping (D3BJ)<sup>6</sup> making use of the resolution of identity (RI) approximation. The basis set chosen was def2-SVP on all light elements and def2-TZVP/ECP on Sn as implemented in ORCA4.2.<sup>7-10</sup> Absence of imaginary frequencies on this level of theory confirmed local minima on the PES. For all calculations *tight* convergence criteria for optimisations and *verytight* for SCF convergence were applied with *grid6* and *finalgrid7* gridsizes. On the basis of this optimized structure NMR chemical shifts were computed at SO-ZORA level with ADF,<sup>11, 12, 13</sup> including the crucial exchange correlation kernel (PBE density functional, basis sets: TZ2P for Sn, TZP for O, C, H).<sup>14</sup> The obtained <sup>119</sup>Sn NMR shieldings were converted to chemical shifts ( $\delta$ , in ppm) relative to the shieldings of tetramethyltin ( $\sigma[^{119}\text{Sn}]=2901.613$ ) calculated at identical computational level.

Table S2. Comparison of structural data of **5**, calculated structure, data of crystal structure analysis.

|           | X-ray data (Å) | calc. structure (Å) |
|-----------|----------------|---------------------|
| Sn1–Sn2   | 2.8796(7)      | 2.924               |
| Sn1–O1    | 2.226(2)       | 2.183               |
| Sn2–O1'   | 2.097(3)       | 2.284               |
| Sn2–C1'   | 2.267(2)       | 2.261               |
| Sn1–C1    | 2.145(2)       | 2.195               |
| O1–C2     | 1.241(3)       | 1.270, 1.262        |
| Sn1–H1    | 1.79(2)        | 1.730               |
| O1–C2–O1' | 129.1(5)       | 128.1               |

Table S3. Principal components of the <sup>119</sup>Sn chemical shift tensor

|                       | Sn–H (exp.) <sup>a</sup> | Sn (exp.) <sup>a</sup> | Sn–H (theor.) <sup>a</sup> | Sn (theor.) <sup>a</sup> |
|-----------------------|--------------------------|------------------------|----------------------------|--------------------------|
| $\delta_{\text{iso}}$ | 112                      | 146                    | 78.1                       | 197.7                    |
| $\delta_{11}$         | 658(8)                   | 885(29)                | 642                        | 937                      |
| $\delta_{22}$         | –62(6)                   | 218(20)                | –86                        | 453                      |
| $\delta_{33}$         | –261(6)                  | –665(21)               | –322                       | –797                     |

<sup>a</sup> in ppm

## References

1. M. Alla and E. Lippmaa, *Chem. Phys. Lett.*, 1976, **37**, 260-264.
2. F. Neese, *Wiley Interdiscip. Rev. Comput. Mol. Sci.*, 2018, **8**, e1327.
3. F. Neese, *Wiley Interdiscip. Rev. Comput. Mol. Sci.*, 2012, **2**, 73-78.
4. A. D. Becke, *Phys. Rev. A*, 1988, **38**, 3098-3100.
5. J. P. Perdew and W. Yue, *Phys. Rev. B*, 1986, **33**, 8800-8802.
6. S. Grimme, S. Ehrlich and L. Goerigk, *J. Comput. Chem.*, 2011, **32**, 1456-1465.
7. F. Weigend and R. Ahlrichs, *Phys. Chem. Chem. Phys.*, 2005, **7**, 3297-3305.
8. F. Weigend, *Phys. Chem. Chem. Phys.*, 2006, **8**, 1057-1065.
9. B. Metz, H. Stoll and M. Dolg, *J. Chem. Phys.*, 2000, **113**, 2563-2569.
10. D. Andrae, U. Häussermann, M. Dolg, H. Stoll and H. Preuß, *Theoret. Chim. Acta*, 1990, **77**, 123-141.
11. ADF 2019.3, SCM, Theoretical Chemistry, Vrije Universiteit, Amsterdam, The Netherlands, <http://www.scm.com>.
12. S. K. Wolff, T. Ziegler, E. van Lenthe and E. J. Baerends, *J. Chem. Phys.*, 1999, **110**, 7689-7698.

13. S. K. Wolff and T. Ziegler, *J. Chem. Phys.*, 1998, **109**, 895-905.
14. J. Autschbach, *Mol. Phys.*, 2013, **111**, 2544-2554.

## Optimized geometry of 5

177

Sn2C73H100O2

|   |              |              |              |
|---|--------------|--------------|--------------|
| H | 8.844126000  | 4.922378000  | 2.830070000  |
| O | 10.451883000 | 6.883624000  | 3.966584000  |
| C | 13.377912000 | 6.273765000  | 2.800725000  |
| C | 8.900650000  | 2.824037000  | 0.919431000  |
| C | 12.819412000 | 5.421331000  | 1.705625000  |
| C | 13.029019000 | 4.465731000  | -0.527101000 |
| H | 13.545697000 | 4.423071000  | -1.487031000 |
| C | 13.166922000 | 7.667677000  | 2.808383000  |
| C | 14.290878000 | 7.826218000  | 4.975607000  |
| C | 14.490146000 | 4.182633000  | 3.791262000  |
| H | 13.589812000 | 3.628590000  | 3.479487000  |
| C | 13.463229000 | 5.351843000  | 0.458188000  |
| H | 14.333688000 | 5.983872000  | 0.275467000  |
| C | 9.620338000  | 0.668947000  | 2.550026000  |
| H | 9.896713000  | -0.172731000 | 3.189058000  |
| C | 14.110630000 | 5.659595000  | 3.853515000  |
| C | 11.687356000 | 4.615913000  | 1.930978000  |
| C | 14.538310000 | 6.450655000  | 4.923038000  |
| H | 15.073504000 | 5.978354000  | 5.746382000  |
| C | 11.296643000 | 3.665811000  | 0.963030000  |
| C | 13.631378000 | 8.417276000  | 3.897840000  |
| H | 13.451416000 | 9.494619000  | 3.922490000  |
| C | 12.056576000 | 1.336619000  | 2.560608000  |
| H | 12.624666000 | 2.242854000  | 2.310096000  |
| C | 10.607619000 | 1.579446000  | 2.161319000  |
| C | 7.951620000  | 1.880360000  | 1.329472000  |
| H | 6.915105000  | 2.012133000  | 1.021008000  |
| C | 14.970212000 | 3.586382000  | 5.117383000  |
| H | 15.923510000 | 4.031770000  | 5.439862000  |
| H | 15.143809000 | 2.509090000  | 4.992878000  |
| H | 14.235182000 | 3.713154000  | 5.923526000  |
| C | 11.967333000 | 3.597978000  | -0.263920000 |
| H | 11.669963000 | 2.849574000  | -1.000392000 |
| C | 12.461836000 | 8.362387000  | 1.652415000  |
| H | 11.904733000 | 7.590720000  | 1.099759000  |
| C | 8.288980000  | 0.795949000  | 2.144017000  |
| C | 14.732619000 | 8.652167000  | 6.169008000  |
| H | 14.295152000 | 9.657344000  | 6.043210000  |
| C | 10.243381000 | 2.669022000  | 1.330200000  |
| C | 13.500616000 | 8.974868000  | 0.694847000  |
| H | 13.006215000 | 9.435992000  | -0.173209000 |
| H | 14.205378000 | 8.217629000  | 0.326654000  |



|   |              |              |              |
|---|--------------|--------------|--------------|
| H | 14.085341000 | 9.752818000  | 1.208984000  |
| C | 8.487306000  | 3.999545000  | 0.048309000  |
| H | 9.238432000  | 4.790905000  | 0.201062000  |
| C | 10.861223000 | 7.378222000  | 5.062469000  |
| H | 10.865612000 | 8.481136000  | 5.110043000  |
| C | 12.236861000 | 1.080770000  | 4.060089000  |
| H | 11.728336000 | 0.163858000  | 4.388407000  |
| H | 11.842453000 | 1.910409000  | 4.664543000  |
| H | 13.302381000 | 0.972441000  | 4.304983000  |
| C | 7.280402000  | -0.259177000 | 2.567980000  |
| H | 7.499694000  | -0.497812000 | 3.623679000  |
| C | 12.647529000 | 0.188204000  | 1.725535000  |
| H | 13.709883000 | 0.038946000  | 1.969133000  |
| H | 12.567292000 | 0.403594000  | 0.650896000  |
| H | 12.114794000 | -0.754506000 | 1.922054000  |
| C | 7.118706000  | 4.576942000  | 0.431314000  |
| H | 7.072380000  | 4.793875000  | 1.507771000  |
| H | 6.298273000  | 3.886557000  | 0.185559000  |
| H | 6.935194000  | 5.512087000  | -0.116375000 |
| C | 8.511342000  | 3.608078000  | -1.439635000 |
| H | 8.239508000  | 4.466436000  | -2.071884000 |
| H | 7.793791000  | 2.796870000  | -1.635518000 |
| H | 9.506568000  | 3.259670000  | -1.745500000 |
| C | 16.262710000 | 8.804261000  | 6.200365000  |
| H | 16.746438000 | 7.822984000  | 6.319201000  |
| H | 16.576403000 | 9.439976000  | 7.041876000  |
| H | 16.636734000 | 9.252026000  | 5.268912000  |
| C | 14.208480000 | 8.069566000  | 7.490798000  |
| H | 14.453413000 | 8.734752000  | 8.331868000  |
| H | 14.665001000 | 7.090622000  | 7.697891000  |
| H | 13.120526000 | 7.925744000  | 7.458427000  |
| C | 11.454085000 | 9.432544000  | 2.092522000  |
| H | 10.700187000 | 9.009160000  | 2.766899000  |
| H | 10.933981000 | 9.841869000  | 1.214345000  |
| H | 11.946448000 | 10.275095000 | 2.600471000  |
| C | 15.576884000 | 3.946070000  | 2.724657000  |
| H | 15.253032000 | 4.266054000  | 1.728394000  |
| H | 15.832007000 | 2.877049000  | 2.672979000  |
| H | 16.489081000 | 4.503084000  | 2.986612000  |
| C | 5.821161000  | 0.197011000  | 2.483248000  |
| H | 5.655106000  | 1.135337000  | 3.029661000  |
| H | 5.159166000  | -0.569848000 | 2.909736000  |
| H | 5.509451000  | 0.352313000  | 1.439275000  |
| C | 7.491101000  | -1.547167000 | 1.749306000  |
| H | 6.810727000  | -2.342766000 | 2.087833000  |
| H | 8.522847000  | -1.913844000 | 1.838951000  |
| H | 7.294204000  | -1.357146000 | 0.683342000  |

|    |              |              |              |
|----|--------------|--------------|--------------|
| O  | 11.256997000 | 6.767334000  | 6.093029000  |
| Sn | 11.486909000 | 4.509745000  | 6.349094000  |
| C  | 8.212772000  | 6.146131000  | 6.950590000  |
| C  | 12.495060000 | 2.579015000  | 8.976064000  |
| C  | 8.723974000  | 5.289270000  | 8.061843000  |
| C  | 8.408497000  | 4.413938000  | 10.317625000 |
| H  | 7.870302000  | 4.430933000  | 11.266555000 |
| C  | 8.364583000  | 7.547517000  | 6.982338000  |
| C  | 7.304836000  | 7.711225000  | 4.782375000  |
| C  | 7.202724000  | 4.038954000  | 5.899998000  |
| H  | 8.106719000  | 3.517573000  | 6.251916000  |
| C  | 8.046977000  | 5.288615000  | 9.294134000  |
| H  | 7.206056000  | 5.969892000  | 9.435413000  |
| C  | 11.694956000 | 0.313138000  | 7.543202000  |
| H  | 11.390142000 | -0.576066000 | 6.985533000  |
| C  | 7.534997000  | 5.528775000  | 5.863544000  |
| C  | 9.813185000  | 4.412877000  | 7.866191000  |
| C  | 7.102118000  | 6.326391000  | 4.801740000  |
| H  | 6.598402000  | 5.854225000  | 3.958263000  |
| C  | 10.121803000 | 3.480468000  | 8.887597000  |
| C  | 7.912853000  | 8.301498000  | 5.889425000  |
| H  | 8.047459000  | 9.386290000  | 5.895201000  |
| C  | 9.278488000  | 1.057556000  | 7.492009000  |
| H  | 8.724834000  | 1.967613000  | 7.760897000  |
| C  | 10.734423000 | 1.276934000  | 7.875659000  |
| C  | 13.415215000 | 1.588065000  | 8.623985000  |
| H  | 14.461764000 | 1.714353000  | 8.907271000  |
| C  | 6.806031000  | 3.428880000  | 4.553279000  |
| H  | 5.846283000  | 3.830491000  | 4.193189000  |
| H  | 6.680361000  | 2.344046000  | 4.670789000  |
| H  | 7.555551000  | 3.589763000  | 3.769537000  |
| C  | 9.428533000  | 3.486128000  | 10.103543000 |
| H  | 9.679059000  | 2.749894000  | 10.869883000 |
| C  | 8.954483000  | 8.258372000  | 8.193721000  |
| H  | 9.418201000  | 7.492180000  | 8.831847000  |
| C  | 13.035673000 | 0.447410000  | 7.906322000  |
| C  | 6.876608000  | 8.543531000  | 3.588785000  |
| H  | 7.187165000  | 9.582448000  | 3.793423000  |
| C  | 11.139267000 | 2.419896000  | 8.600922000  |
| C  | 7.826148000  | 8.927512000  | 9.000596000  |
| H  | 8.221154000  | 9.380046000  | 9.922436000  |
| H  | 7.046371000  | 8.205077000  | 9.277782000  |
| H  | 7.345619000  | 9.721588000  | 8.409071000  |
| C  | 12.942167000 | 3.804605000  | 9.758331000  |
| H  | 12.159583000 | 4.570158000  | 9.634814000  |
| C  | 9.098491000  | 0.838567000  | 5.986284000  |
| H  | 9.621680000  | -0.065897000 | 5.643835000  |

|    |              |              |              |
|----|--------------|--------------|--------------|
| H  | 9.485666000  | 1.686123000  | 5.403545000  |
| H  | 8.033823000  | 0.720875000  | 5.738463000  |
| C  | 14.043293000 | -0.632738000 | 7.557441000  |
| H  | 13.516210000 | -1.372183000 | 6.930912000  |
| C  | 8.674418000  | -0.101768000 | 8.301031000  |
| H  | 7.608296000  | -0.227083000 | 8.060349000  |
| H  | 8.763988000  | 0.084599000  | 9.380350000  |
| H  | 9.187372000  | -1.049814000 | 8.079053000  |
| C  | 14.257720000 | 4.399944000  | 9.240069000  |
| H  | 14.195515000 | 4.609135000  | 8.162265000  |
| H  | 15.108879000 | 3.723437000  | 9.406376000  |
| H  | 14.478920000 | 5.342780000  | 9.760220000  |
| C  | 13.033970000 | 3.478884000  | 11.258736000 |
| H  | 13.319741000 | 4.371450000  | 11.834894000 |
| H  | 13.787363000 | 2.697298000  | 11.439752000 |
| H  | 12.071521000 | 3.114997000  | 11.643673000 |
| C  | 5.349395000  | 8.533156000  | 3.413579000  |
| H  | 4.988309000  | 7.515135000  | 3.203754000  |
| H  | 5.047875000  | 9.176052000  | 2.573108000  |
| H  | 4.842447000  | 8.888701000  | 4.321685000  |
| C  | 7.583184000  | 8.081131000  | 2.304850000  |
| H  | 7.331571000  | 8.741697000  | 1.461757000  |
| H  | 7.276266000  | 7.060557000  | 2.035530000  |
| H  | 8.672839000  | 8.070648000  | 2.433599000  |
| C  | 10.041890000 | 9.287073000  | 7.853023000  |
| H  | 10.902268000 | 8.804752000  | 7.374192000  |
| H  | 10.396593000 | 9.776349000  | 8.772097000  |
| H  | 9.664426000  | 10.077921000 | 7.187606000  |
| C  | 6.078723000  | 3.761678000  | 6.916998000  |
| H  | 6.346431000  | 4.094645000  | 7.926131000  |
| H  | 5.862867000  | 2.683360000  | 6.959965000  |
| H  | 5.157689000  | 4.282783000  | 6.614675000  |
| C  | 15.223713000 | -0.084537000 | 6.743007000  |
| H  | 14.874692000 | 0.396754000  | 5.819644000  |
| H  | 15.917617000 | -0.893003000 | 6.469908000  |
| H  | 15.789857000 | 0.664475000  | 7.315810000  |
| C  | 14.534507000 | -1.353751000 | 8.824209000  |
| H  | 15.220109000 | -2.174684000 | 8.566639000  |
| H  | 13.692307000 | -1.770783000 | 9.393775000  |
| H  | 15.073627000 | -0.657815000 | 9.484315000  |
| Sn | 10.346487000 | 4.724059000  | 3.665370000  |
